# Supplementary material for: Gold(iii) promoted formation of dihydroquinazolinones: double X–H activation by gold
Source: Royal Society of Chemistry journal article supplement (doi:10.1039/d0ra06537d), 2020-01-01
Supplement: d0ra06537d1.pdf [file d0ra06537d1.pdf]

## Supporting Information for

### Gold(III)- promoted formation of dihydroquinazolinones: gold double X-H activation<sup>†</sup>

Veerabhushanam Kadiyala,<sup>a,b</sup> Perla Bharath Kumar,<sup>a,b</sup> Komalla sunil,<sup>a,b</sup> Chittala Emmaniel Raju,<sup>a,b</sup> Balasubramanian Sridhar<sup>c</sup> and Galla V. Karunakar<sup>a,b\*</sup>

<sup>a</sup> Fluoro and Agrochemicals Department, CSIR-Indian Institute of Chemical Technology, Hyderabad, 500007, India.

Email: gallavk@iict.res.in

<sup>b</sup> Academy of Scientific and Innovative Research, Ghaziabad- 201002, India

<sup>c</sup> Center for X-ray Crystallography, CSIR-Indian Institute of Chemical Technology, Hyderabad, 500007, India.

#### Contents:

- |                                                                                           |     |
|-------------------------------------------------------------------------------------------|-----|
| 1. Copies of <sup>1</sup> H and <sup>13</sup> C NMR spectra ( <b>3a-3y</b> and <b>5</b> ) | S2  |
| 2. X-ray crystallography data of <b>3a</b> and <b>5</b>                                   | S29 |

Electronic Supplementary Material (ESI) for Chemical Communications

# 1. Copies of $^1\text{H}$ and $^{13}\text{C}$ NMR spectra (3a-3y and 5).

## 2-(4-Benzoyl-5-phenylfuran-2-yl)-2-phenyl-2,3-dihydroquinazolin-4(1H)-one: **3a**

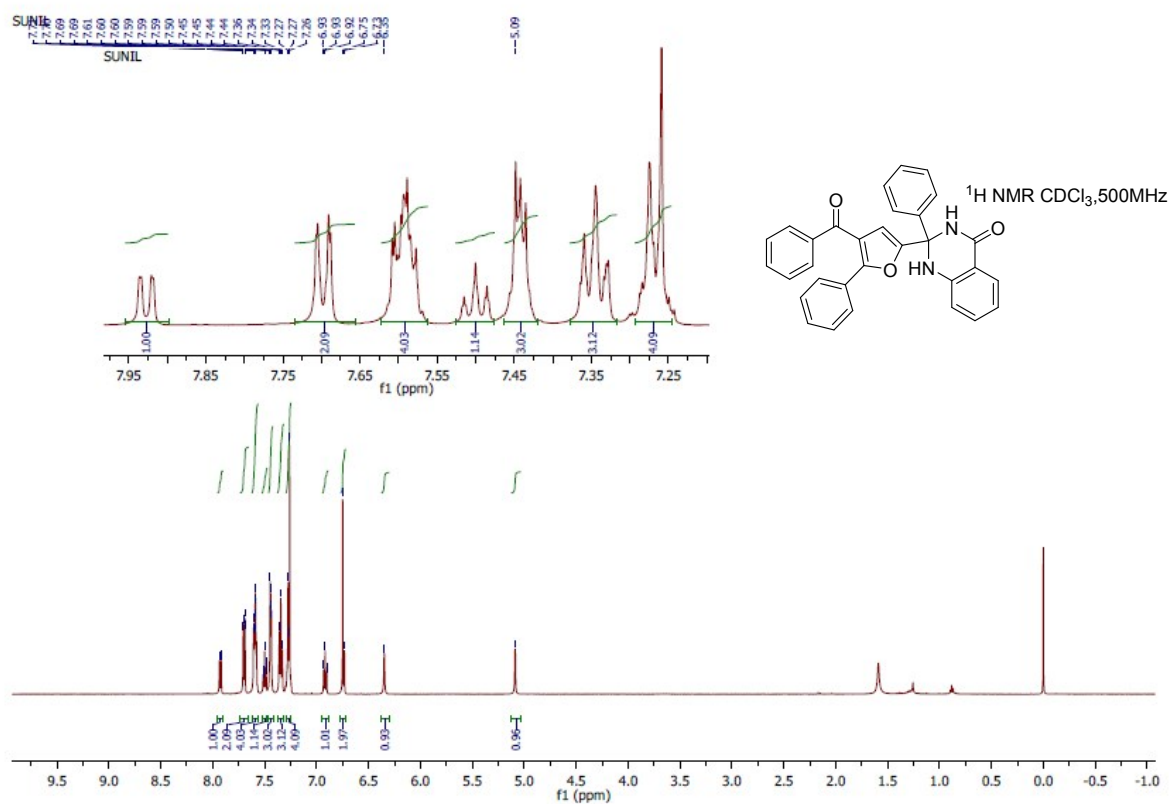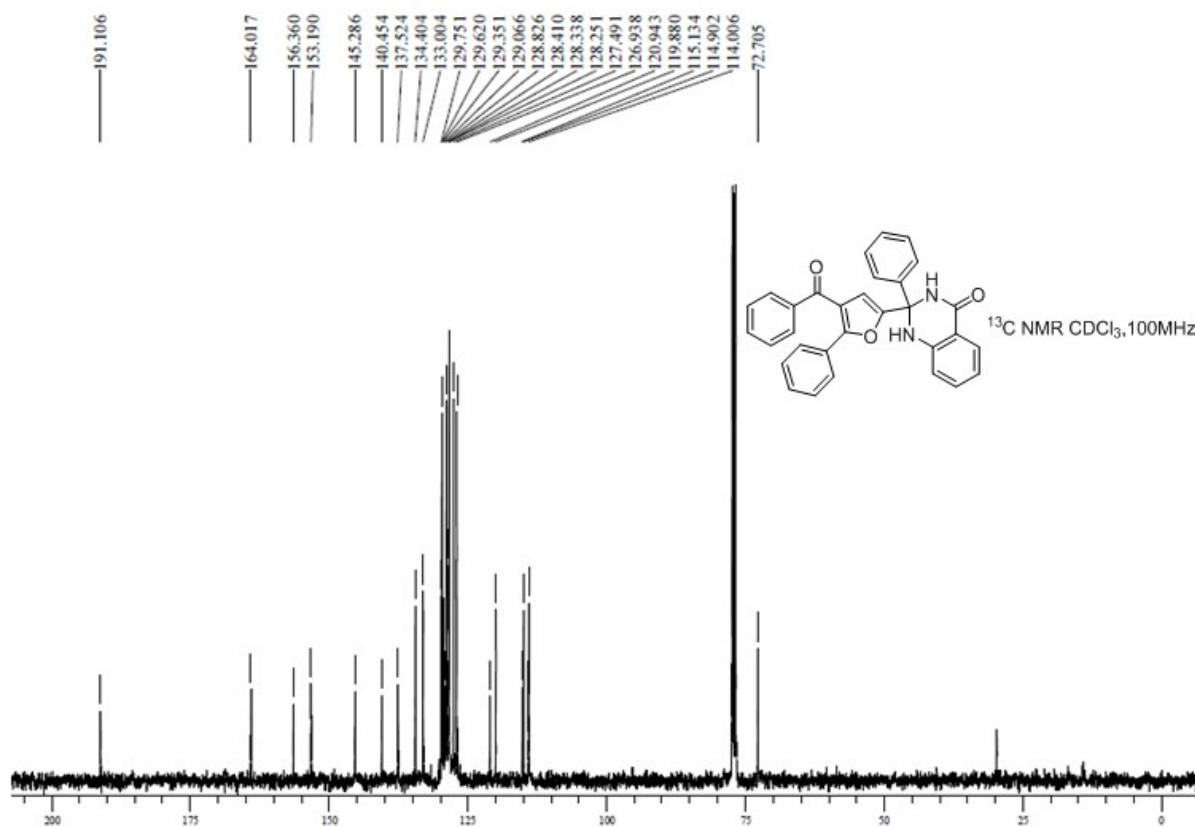

2-(4-Benzoyl-5-phenylfuran-2-yl)-2-(*p*-tolyl)-2,3-dihydroquinazolin-4(*1H*)-one:**3b**

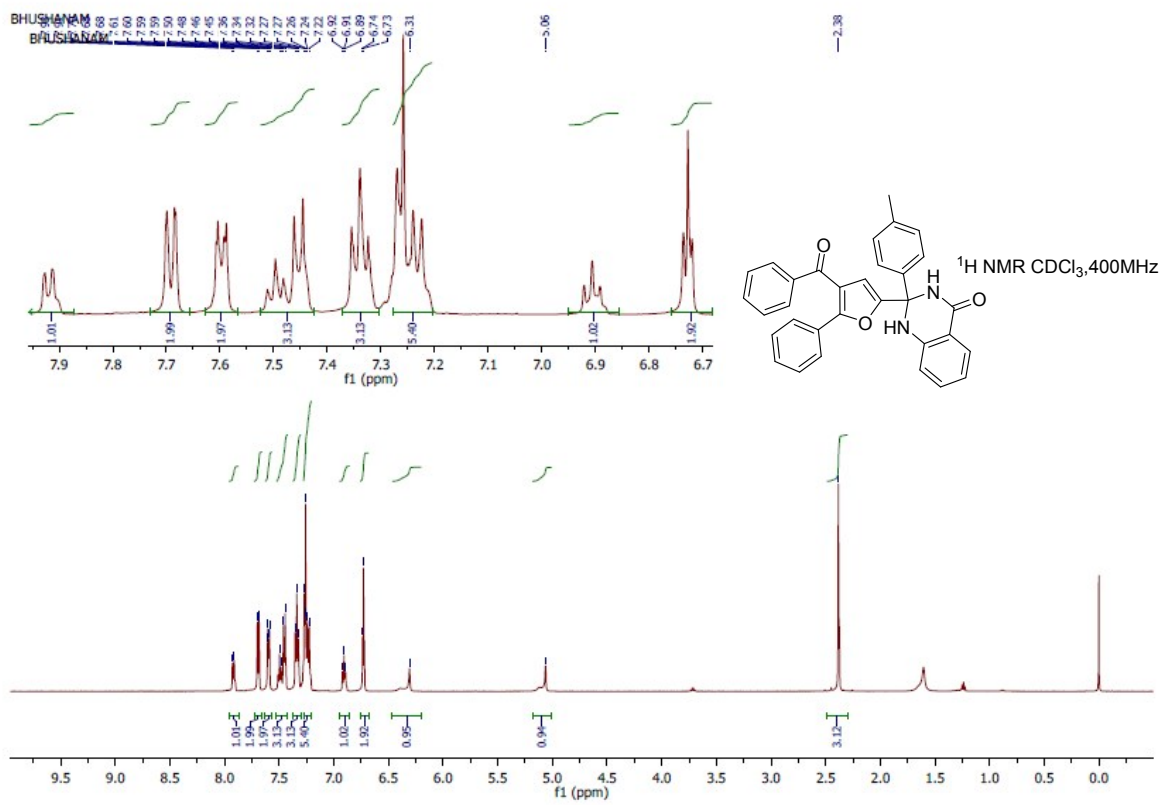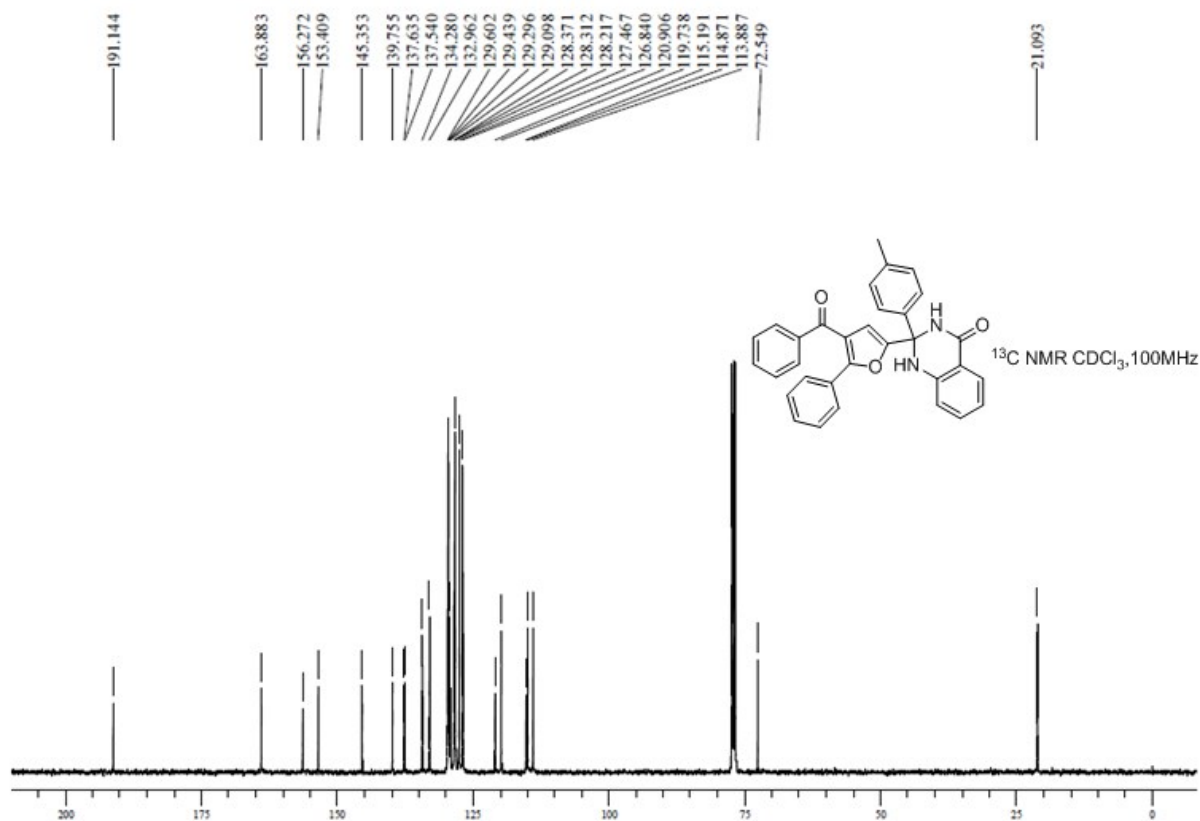

2-(4-Benzoyl-5-phenylfuran-2-yl)-2-(4-methoxyphenyl)-2,3-dihydroquinazolin-4(1*H*)-one:**3c**

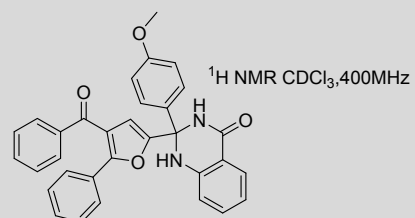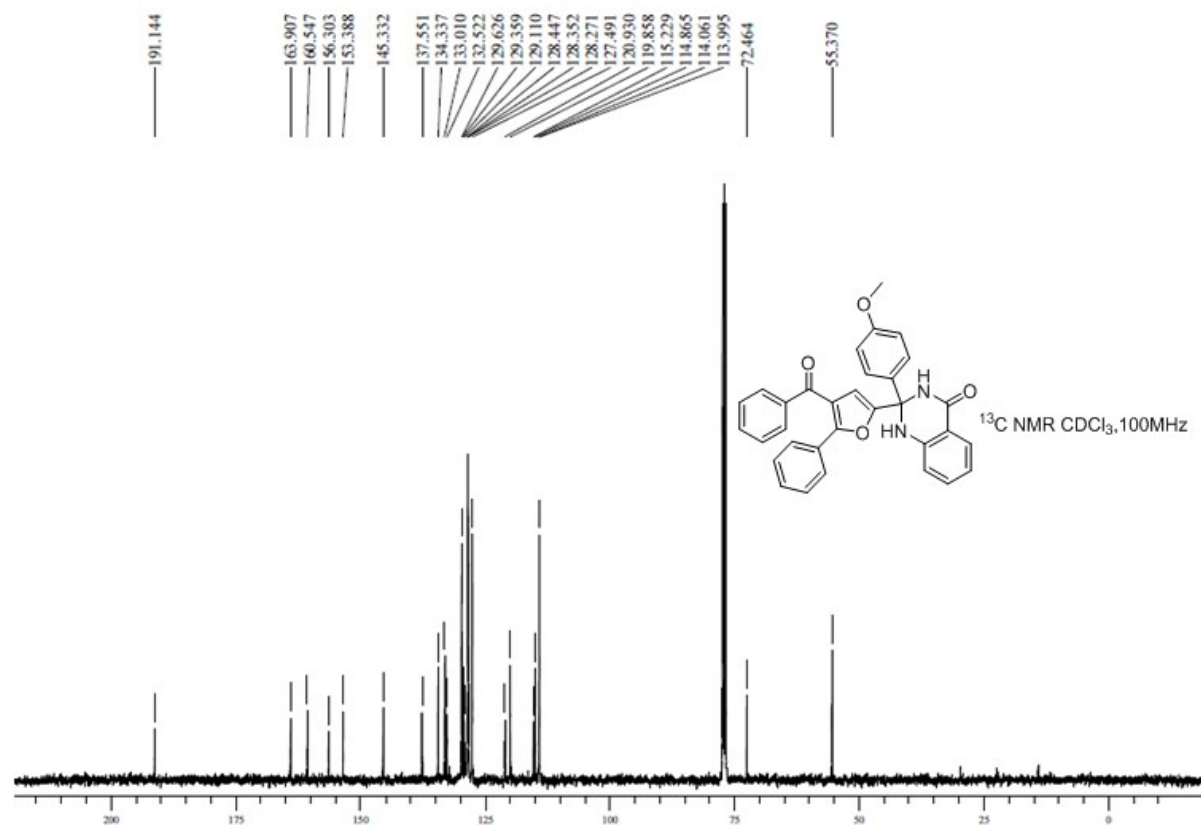

2-(4-Benzoyl-5-phenylfuran-2-yl)-2-(4-fluorophenyl)-2,3-dihydroquinazolin-4(1H)-one: **3d**

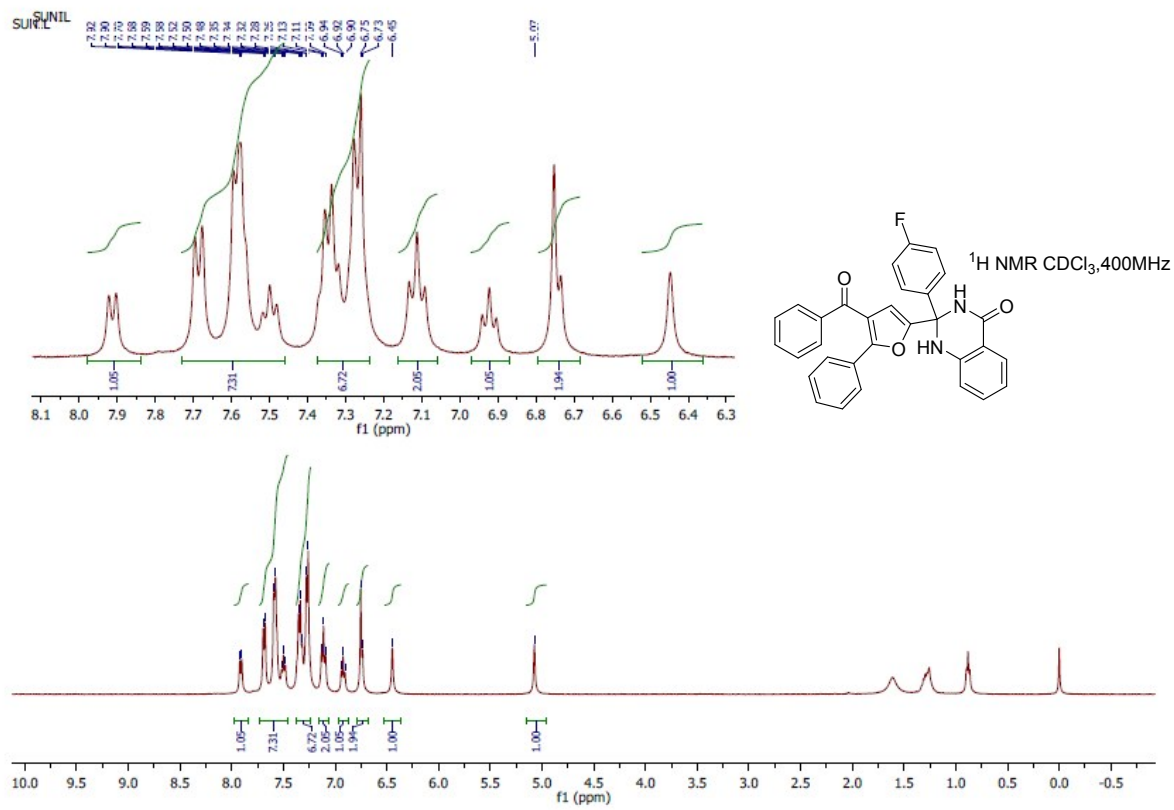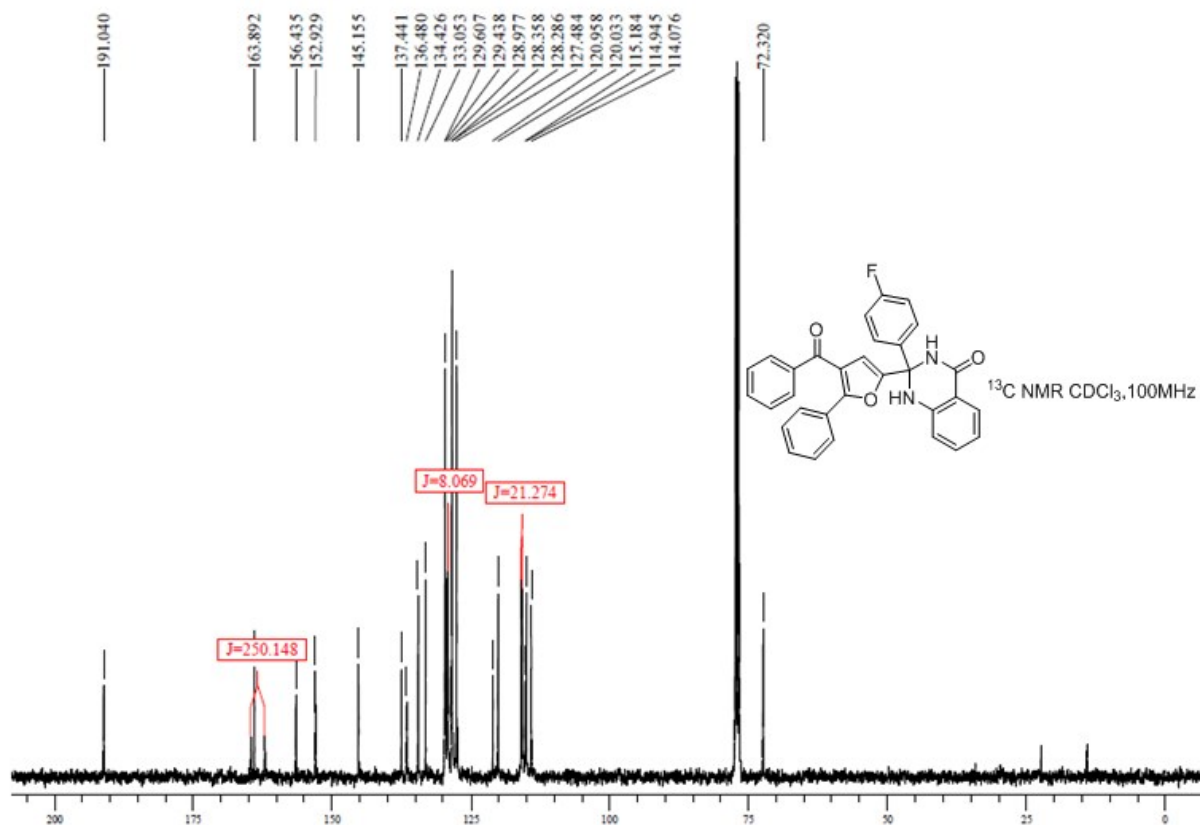

2-(4-(4-Methylbenzoyl)-5-(*p*-tolyl)furan-2-yl)-2-phenyl-2,3-dihydroquinazolin-4(*1H*)-one: **3e**

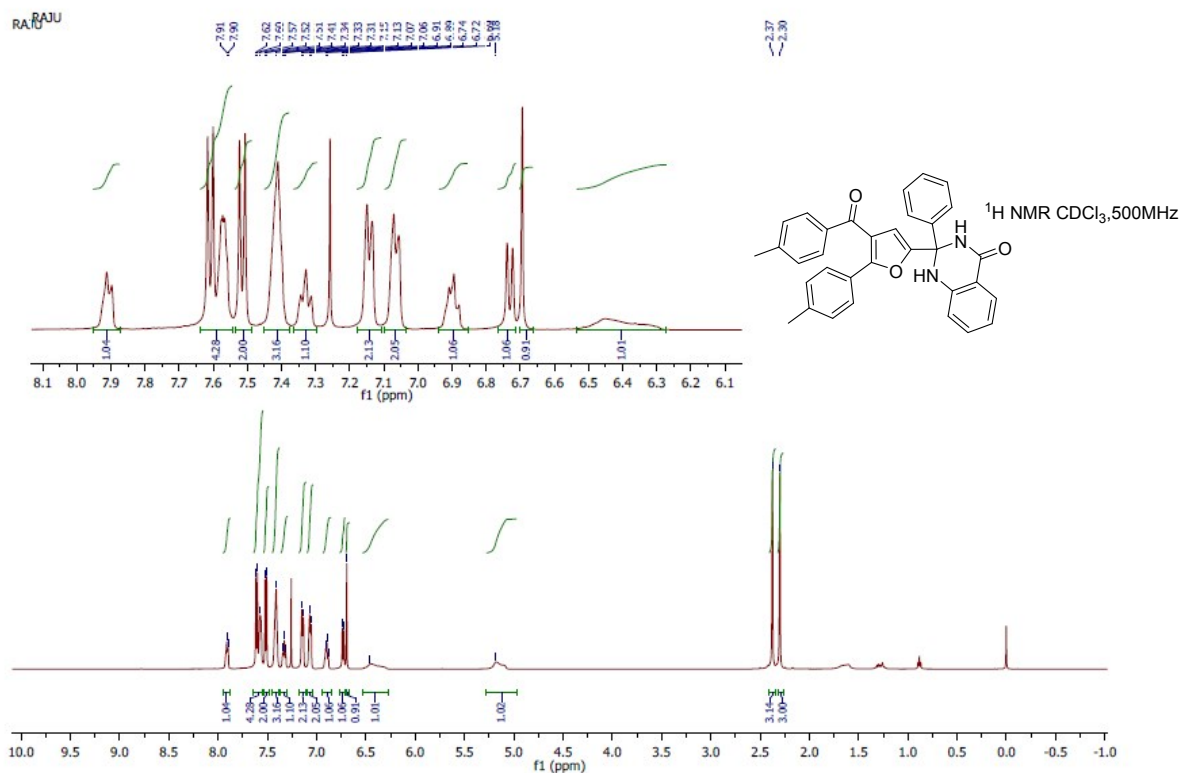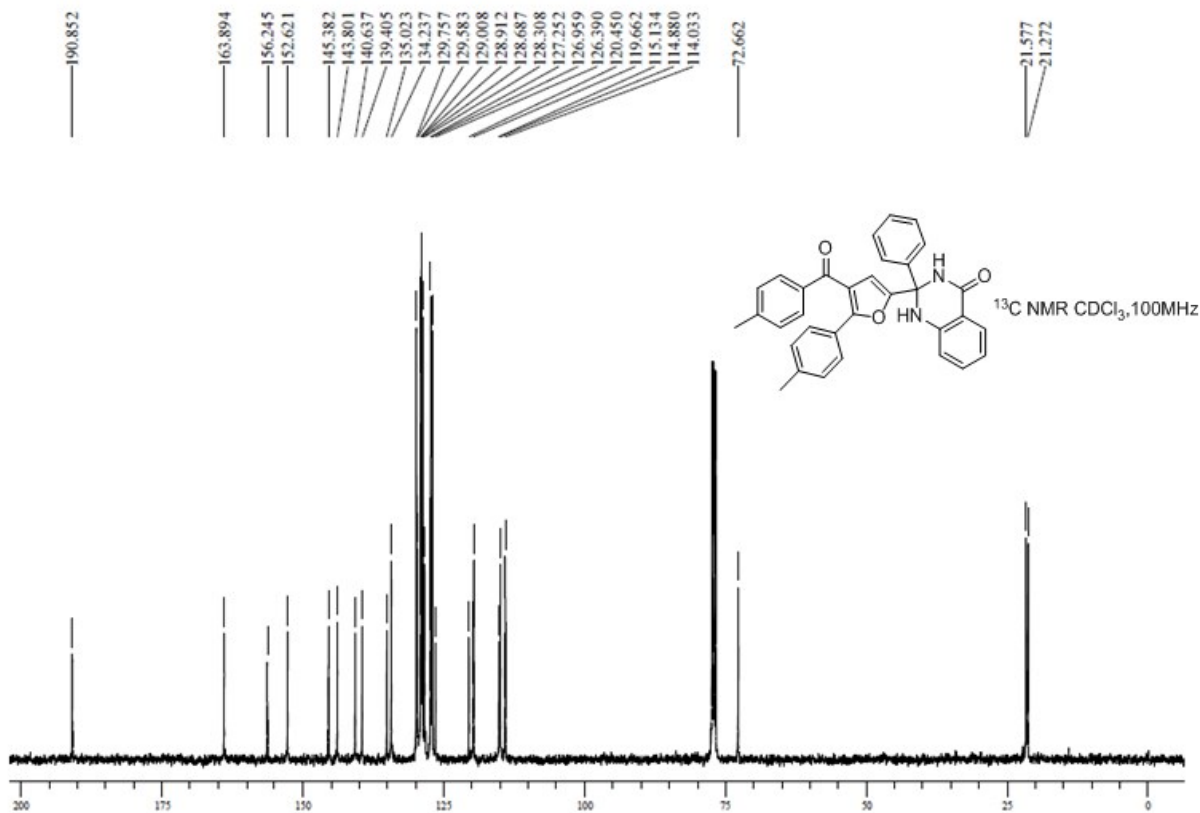

2-(4-(4-Methylbenzoyl)-5-(*p*-tolyl)furan-2-yl)-2-(*p*-tolyl)-2,3-dihydroquinazolin-4(1*H*)-one: **3f**

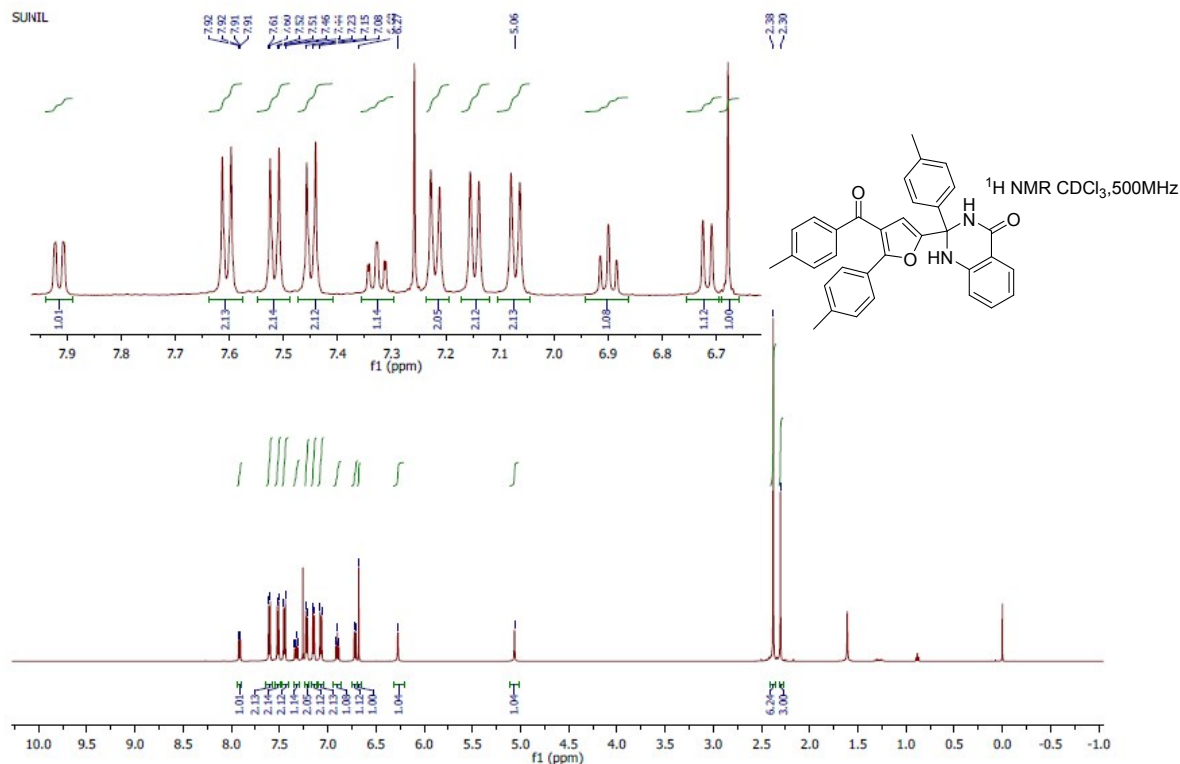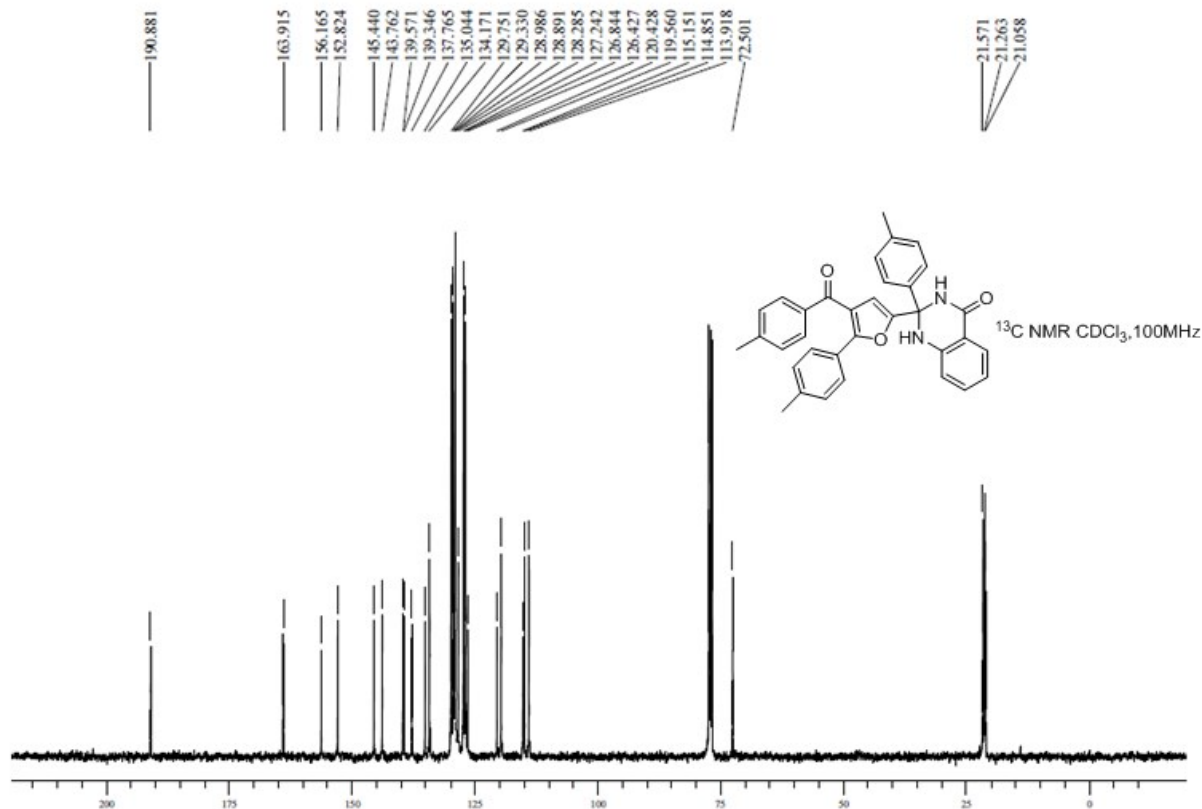

2-(4-Fluorophenyl)-2-(4-(4-methylbenzoyl)-5-(*p*-tolyl)furan-2-yl)-2,3-dihydroquinazolin-4(1*H*)-one:**3g**

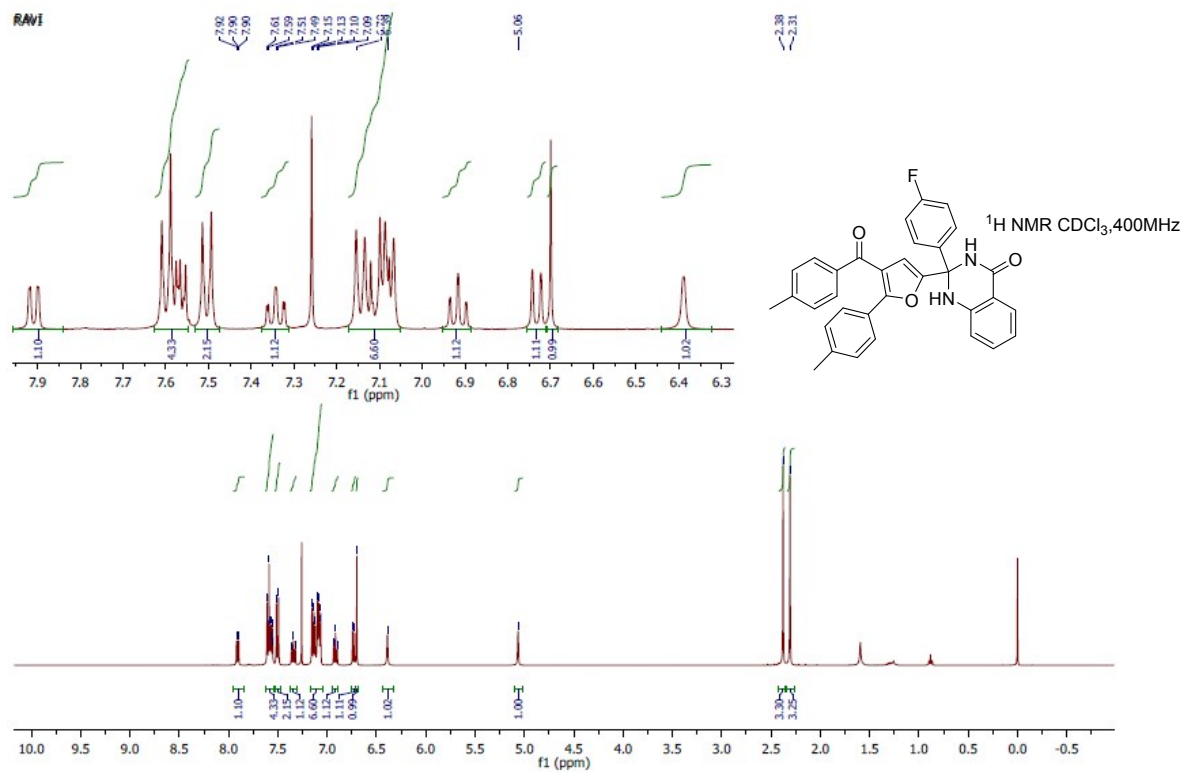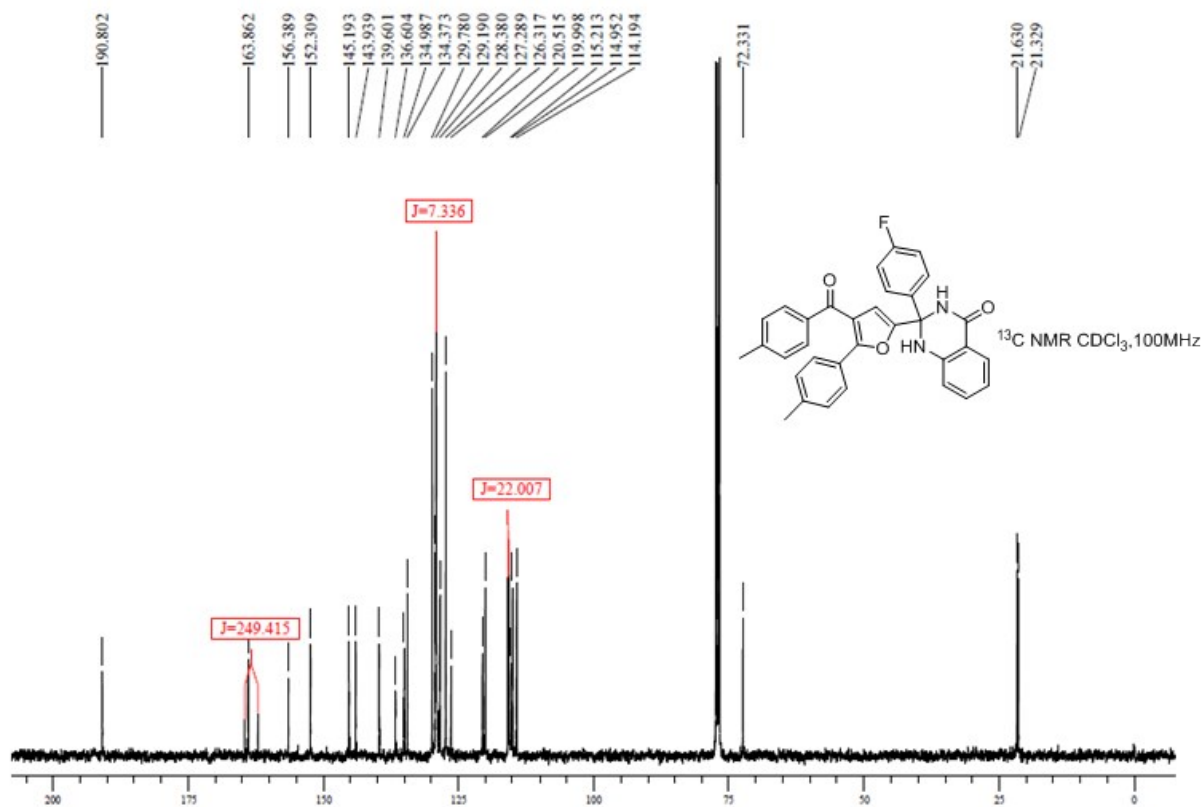



2-(4-Benzoyl-5-phenylfuran-2-yl)-2-(m-tolyl)-2,3-dihydroquinazolin-4(1H)-one: **3h**

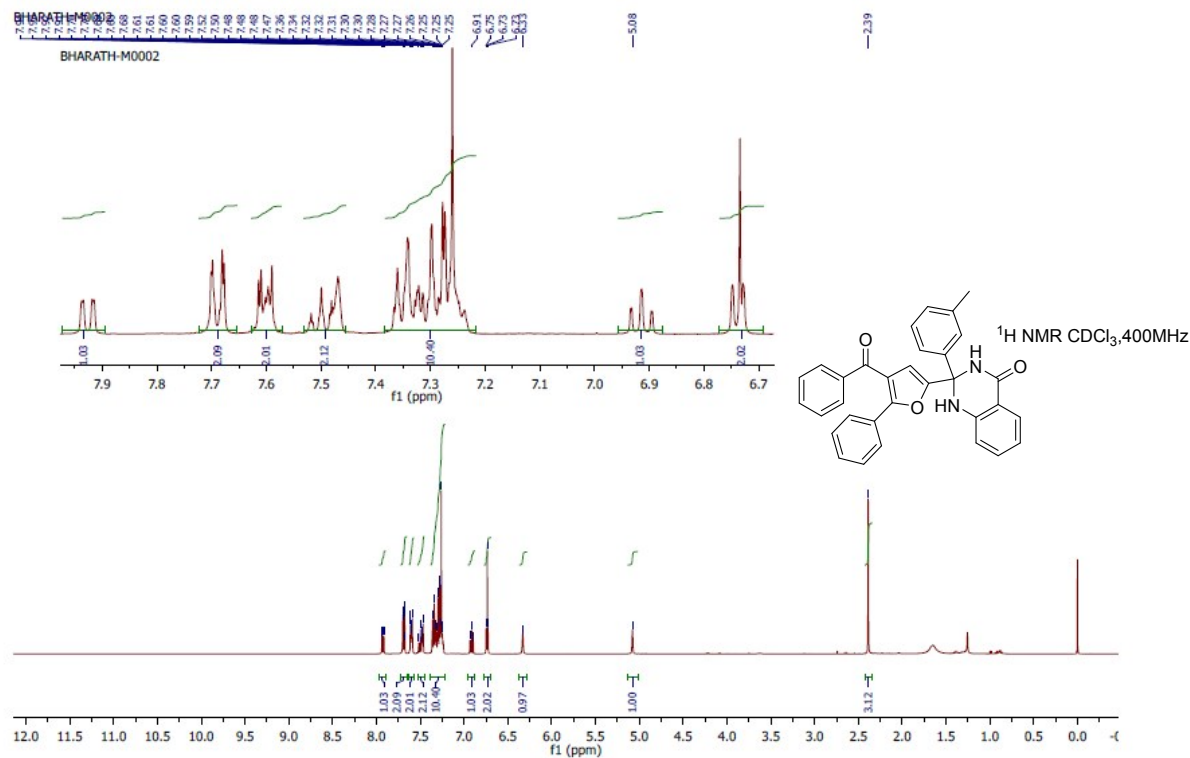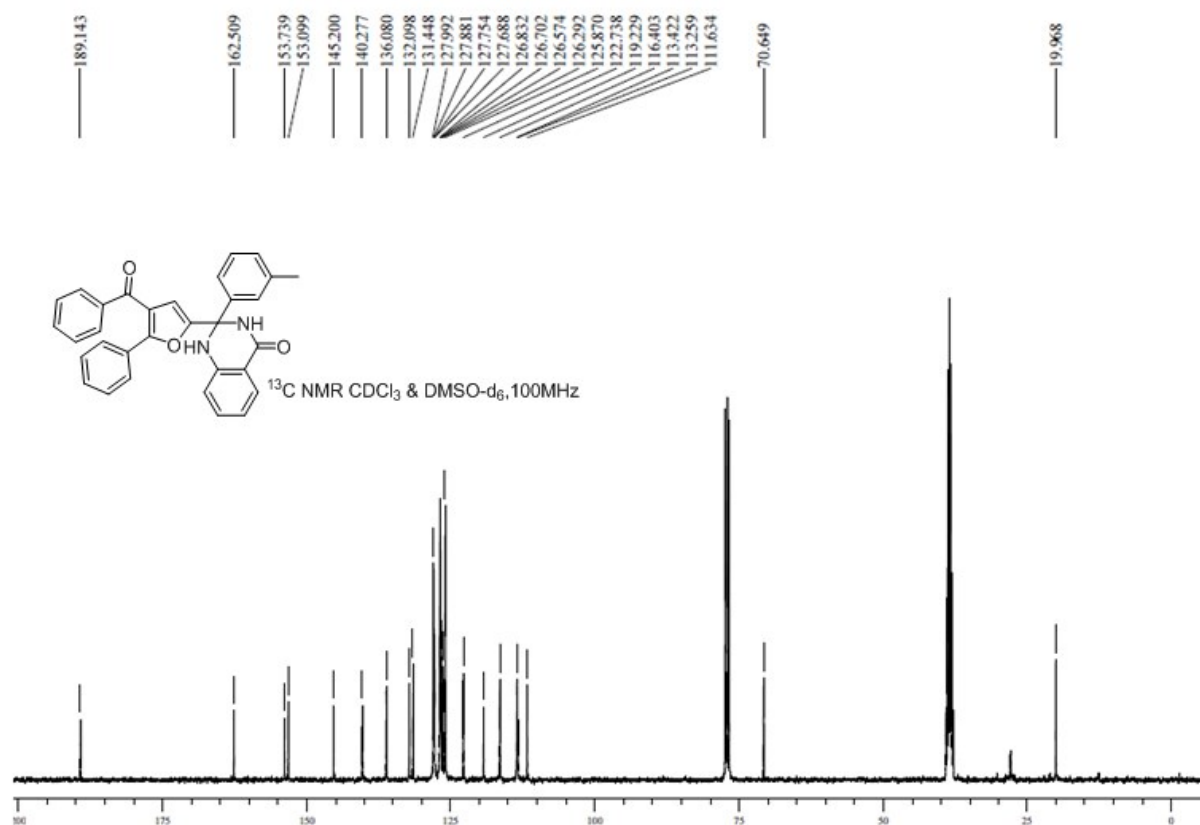

2-(4-(4-Methylbenzoyl)-5-(p-tolyl)furan-2-yl)-2-(m-tolyl)-2,3-dihydroquinazolin-4(1H)-one: **3i**

BHARATH-M0002  
BHARATH-M0002

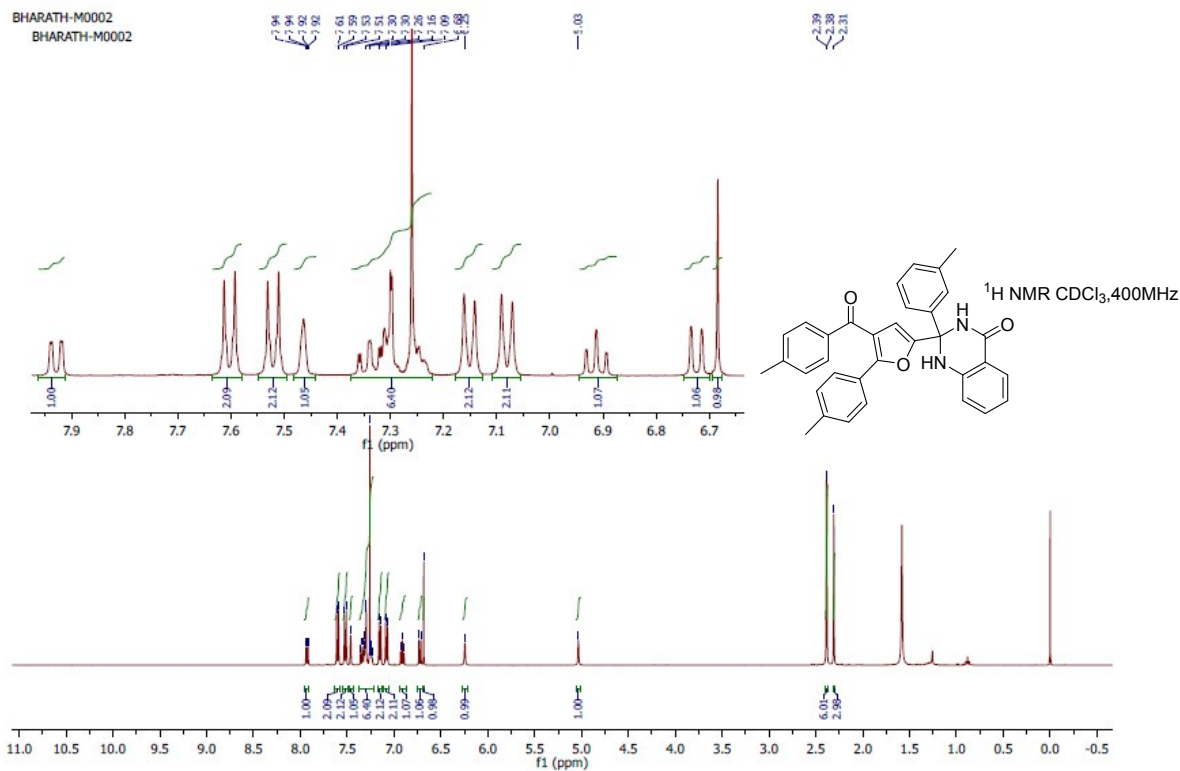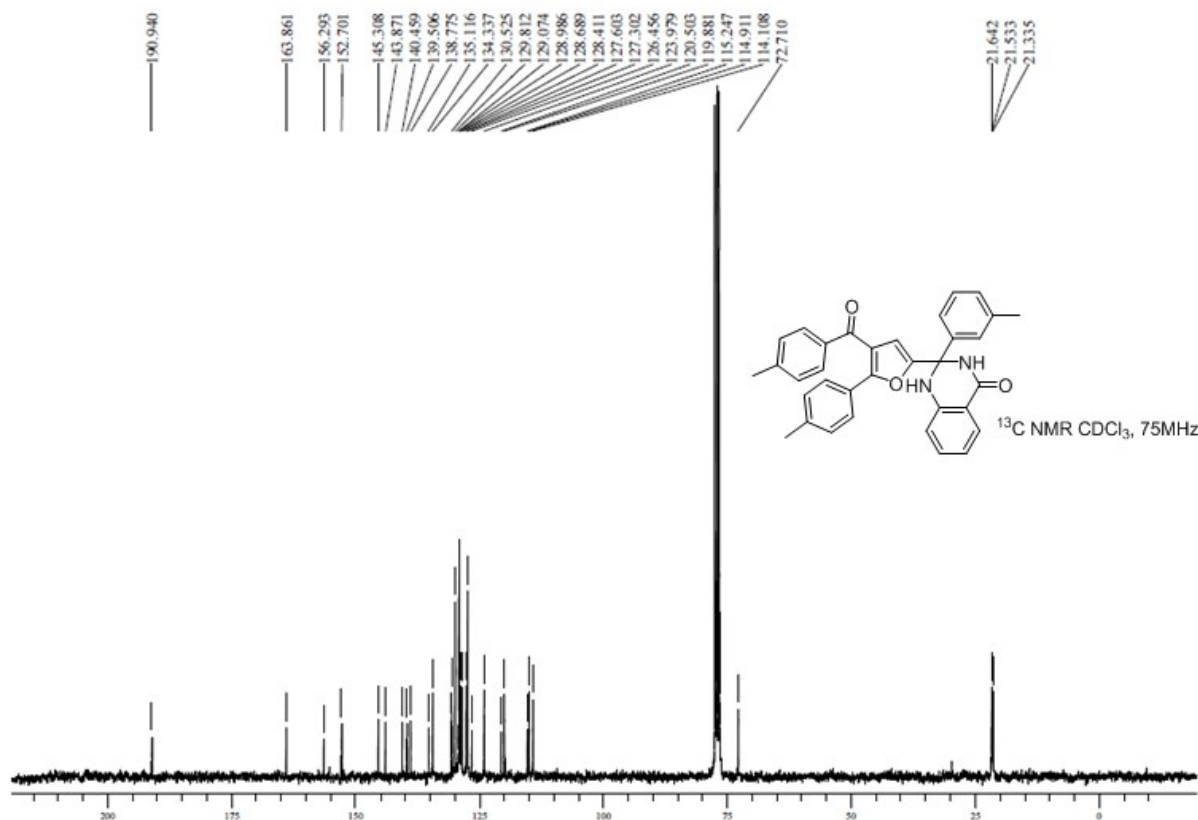

2-(4-(3-Methylbenzoyl)-5-(m-tolyl)furan-2-yl)-2-phenyl-2,3-dihydroquinazolin-4(1H)-one: **3j**

PAWAN-M0002  
PAWAN-M0002

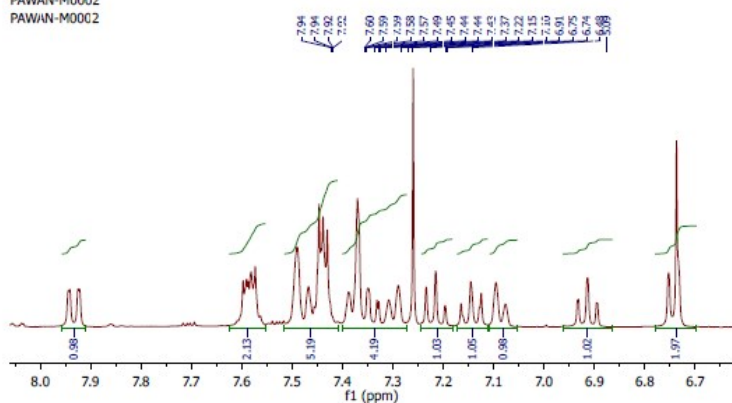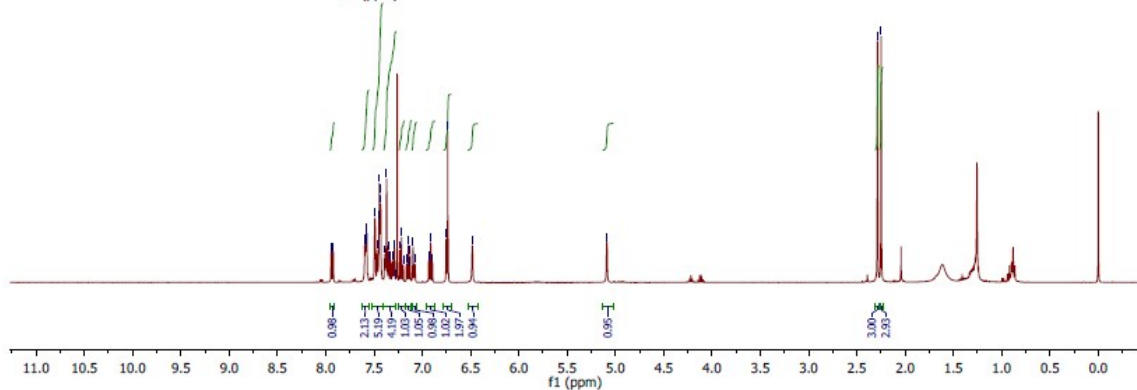

2-(4-Benzoyl-5-phenylfuran-2-yl)-2-hexyl-2,3-dihydroquinazolin-4(1H)-one: **3k**

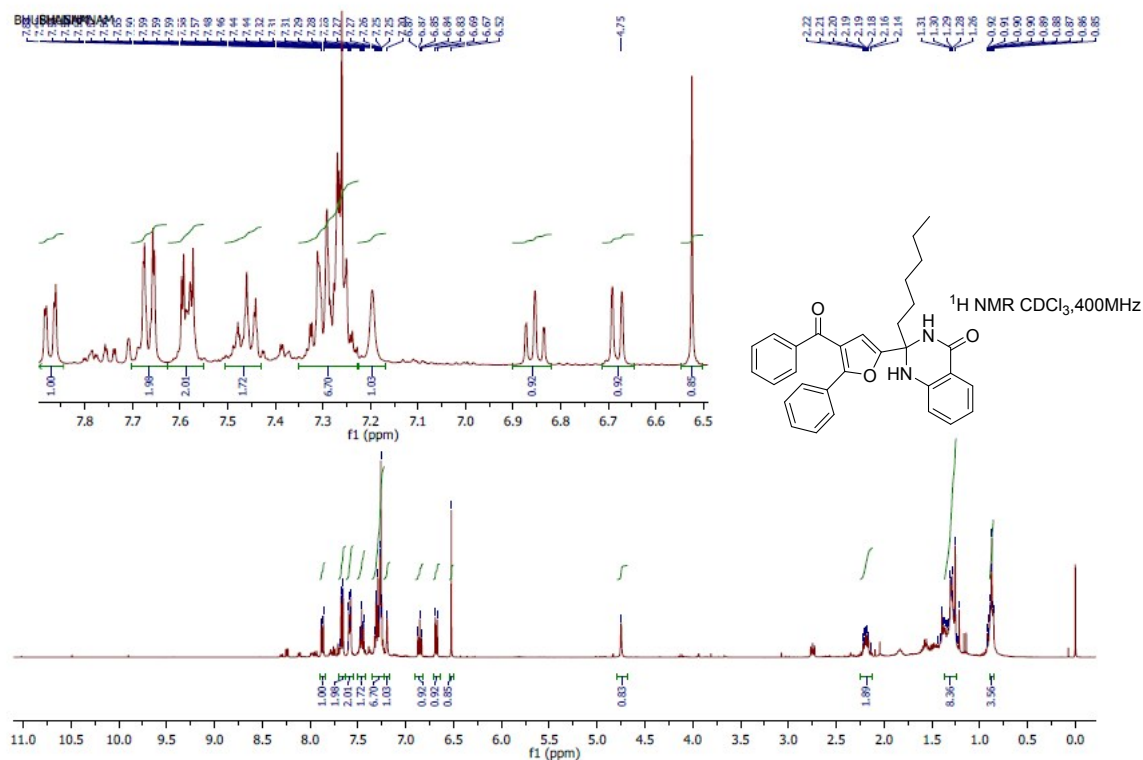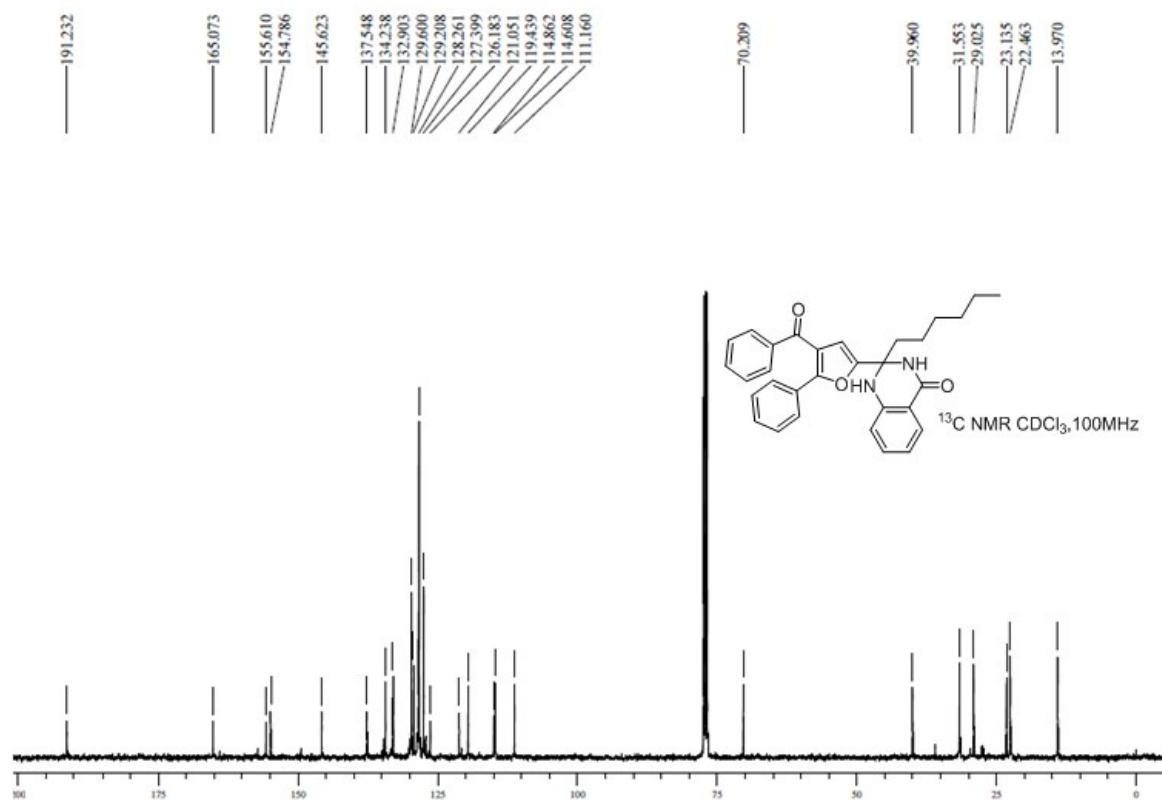

2-(4-Benzoyl-5-phenylfuran-2-yl)-5-methyl-2-phenyl-2,3-dihydroquinazolin-4(1H)-one: **31**

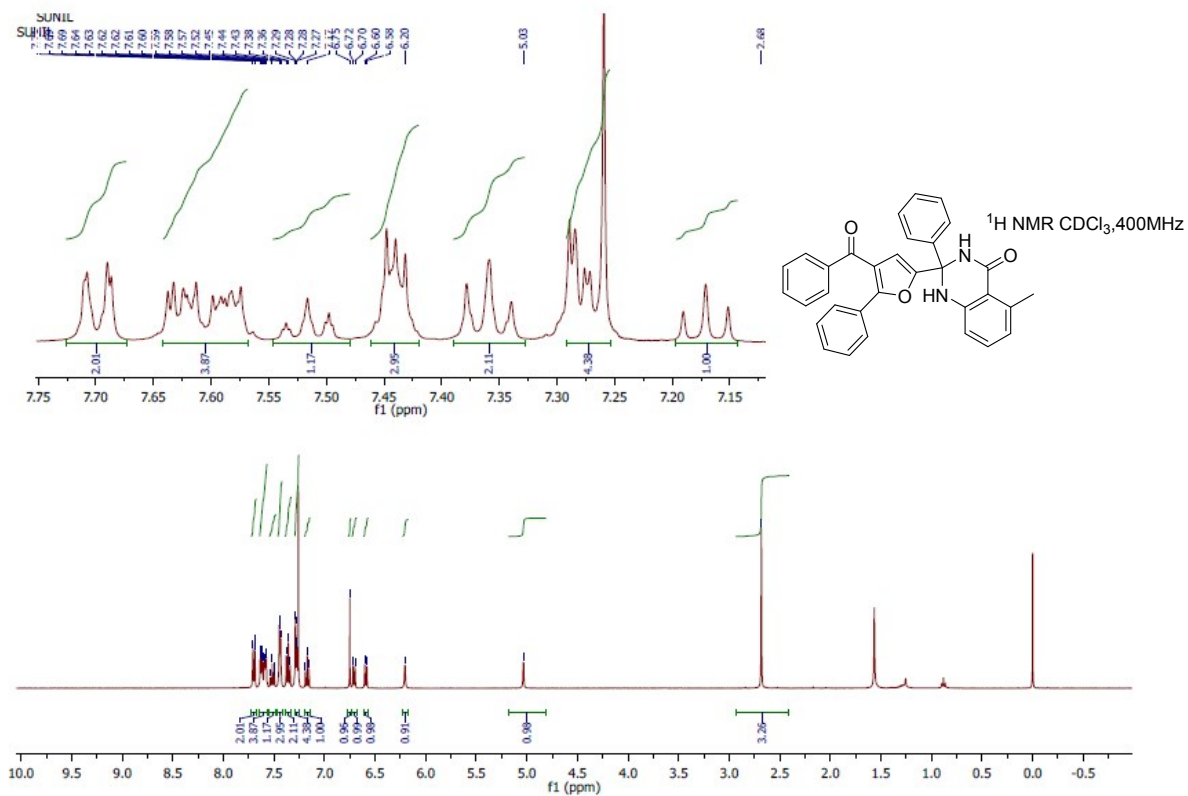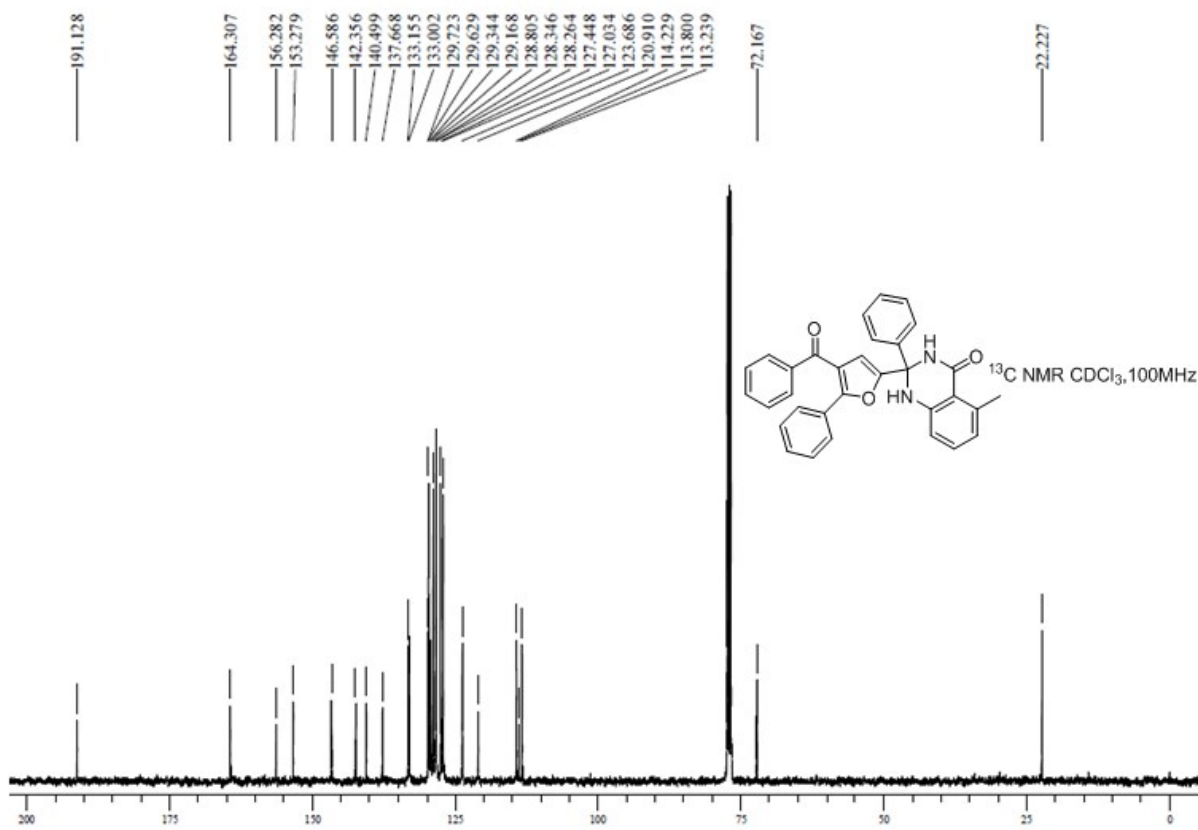

2-(4-Benzoyl-5-phenylfuran-2-yl)-6-chloro-2-phenyl-2,3-dihydroquinazolin-4(1H)-one: **3m**

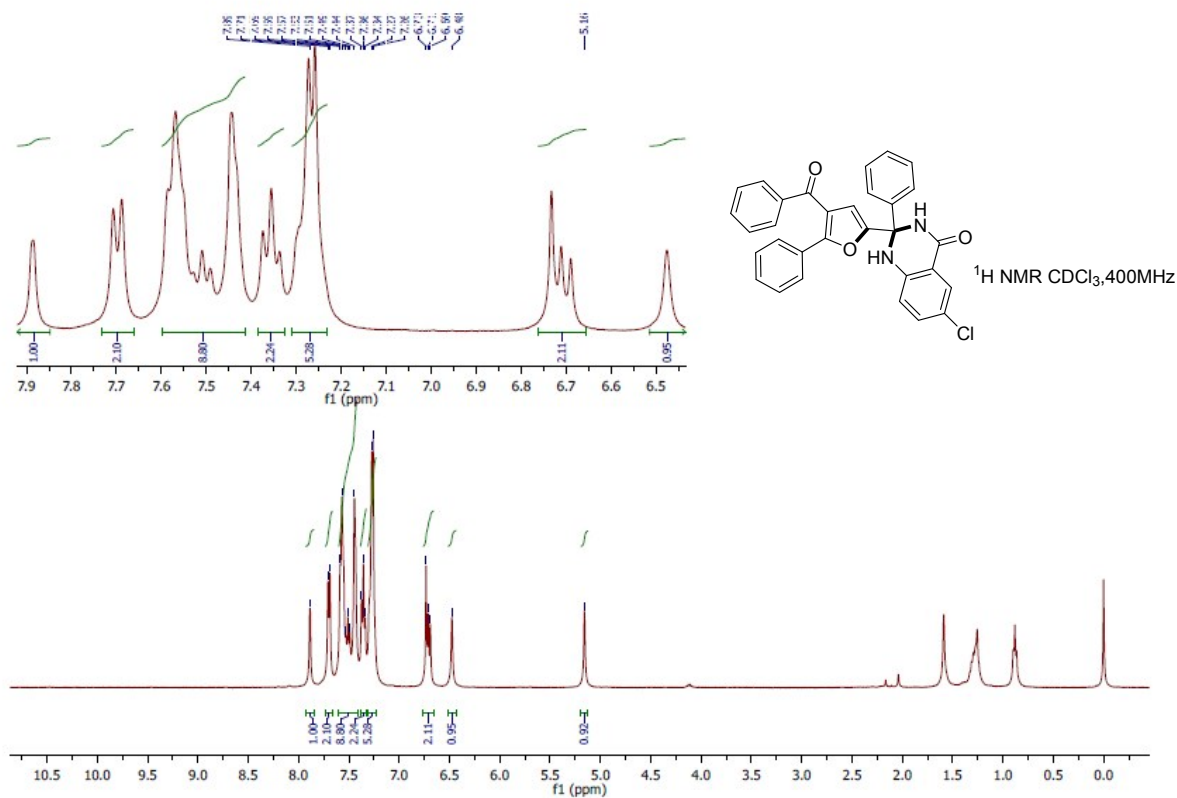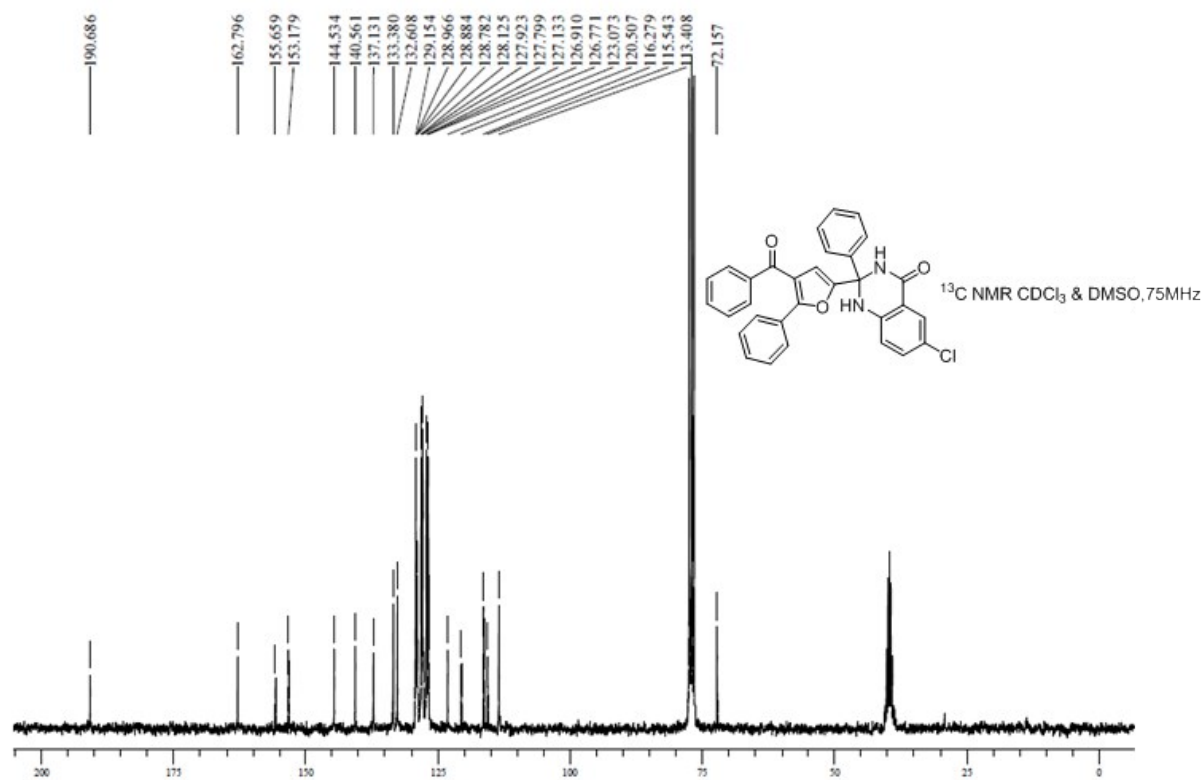

2-(4-Benzoyl-5-phenylfuran-2-yl)-6-bromo-2-phenyl-2,3-dihydroquinazolin-4(1H)-one: **3n**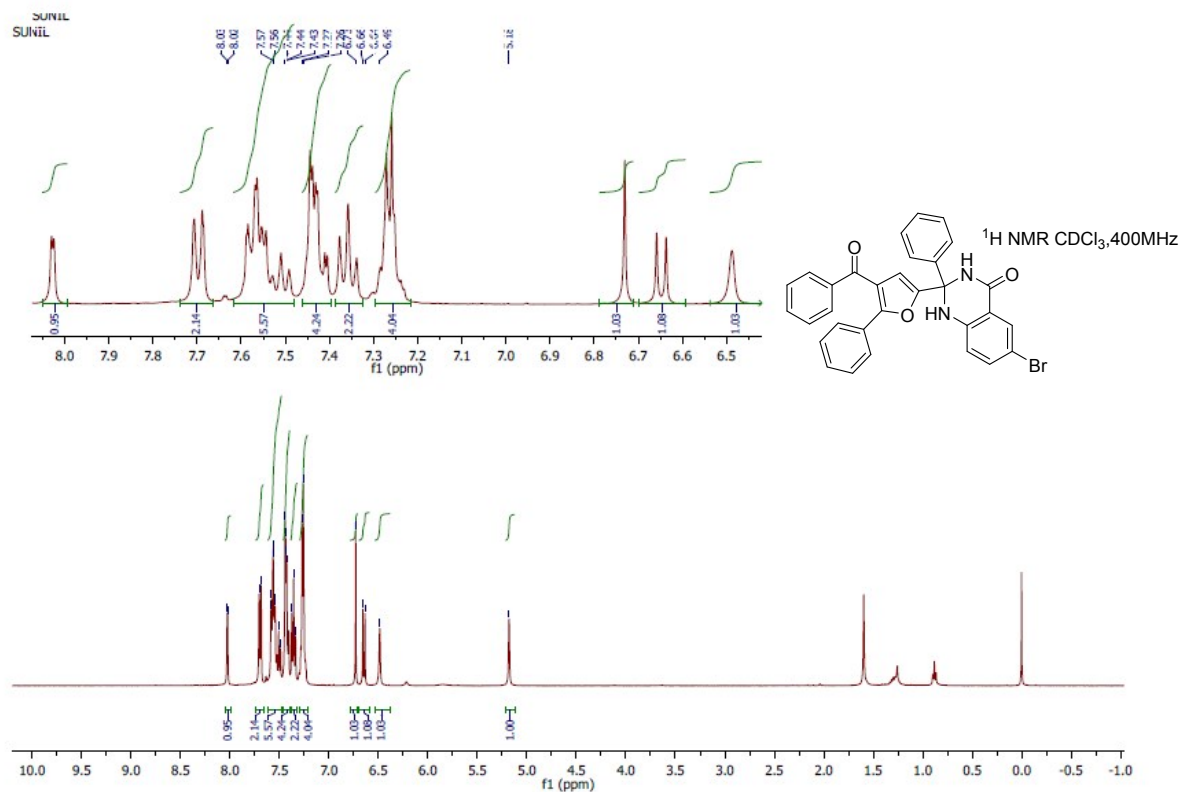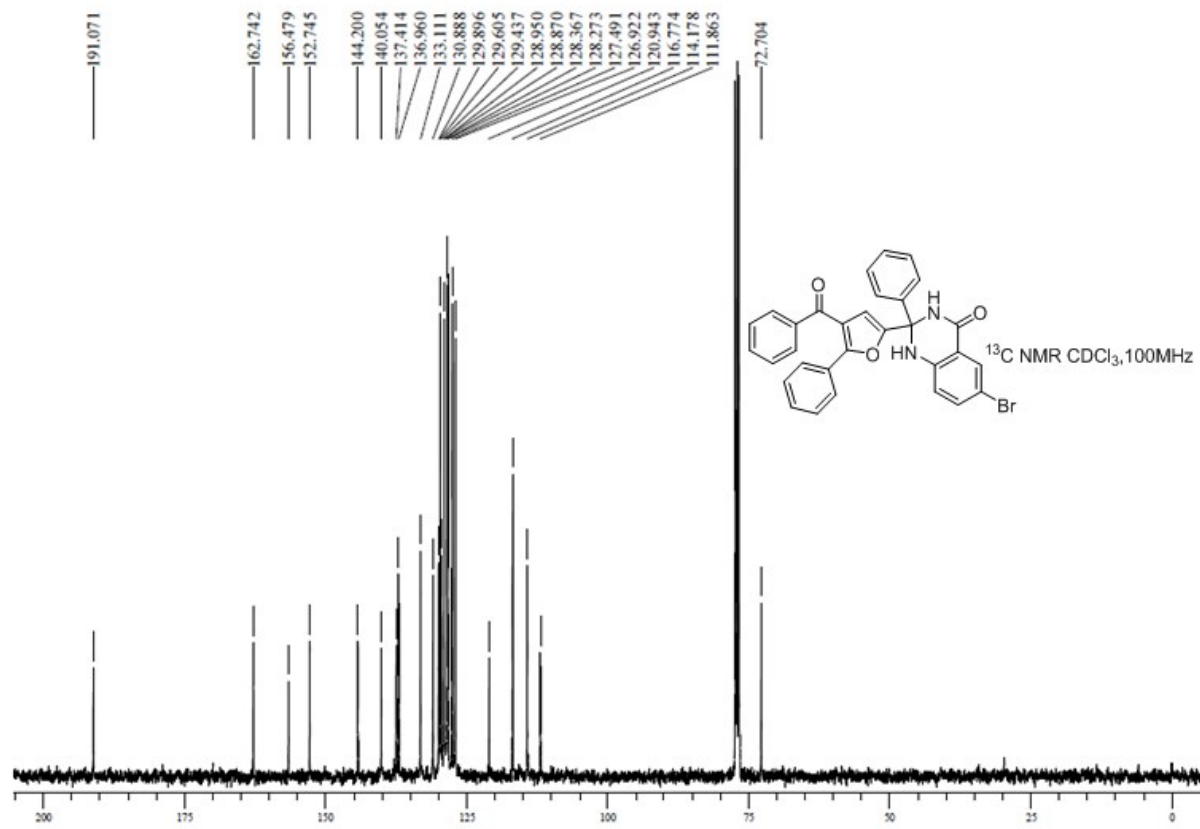



2-(4-Benzoyl-5-phenylfuran-2-yl)-6-iodo-2-phenyl-2,3-dihydroquinazolin-4(1H)-one: **3o**

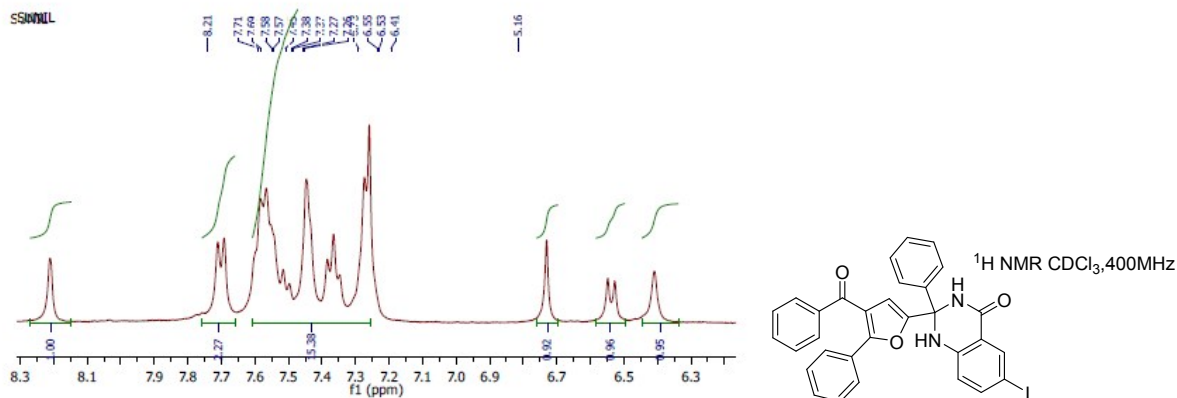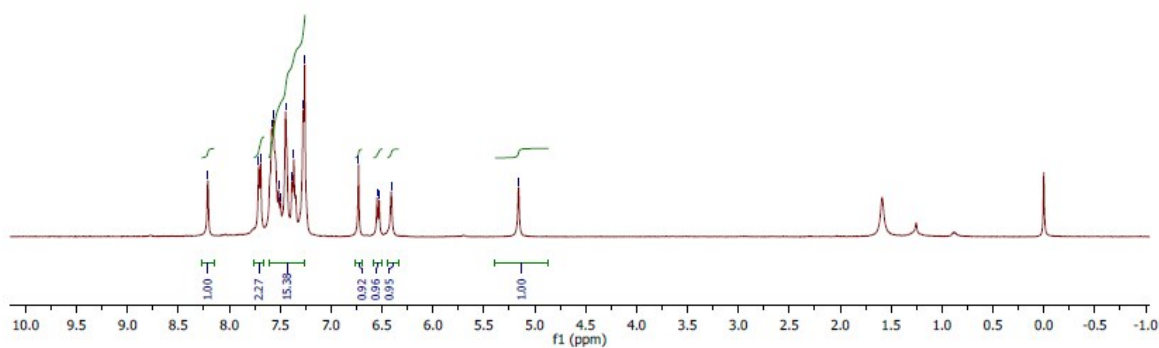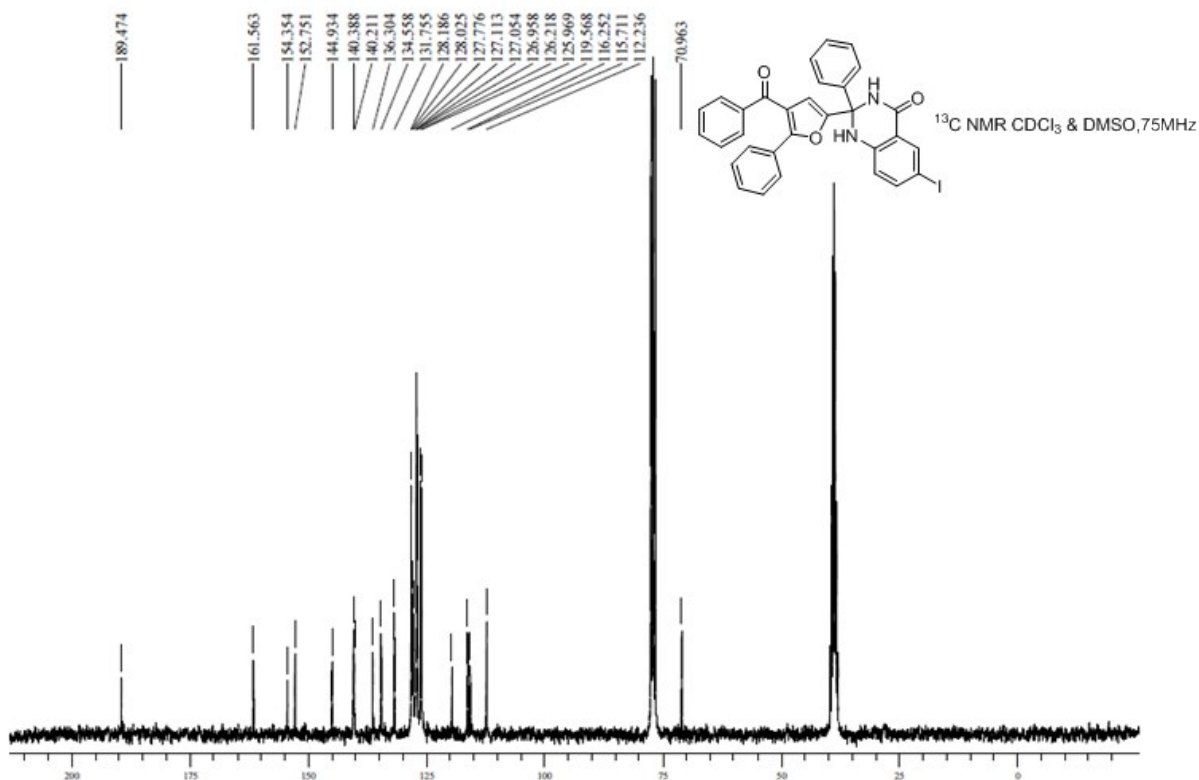



2-(4-Benzoyl-5-phenylfuran-2-yl)-5-methyl-2-(*p*-tolyl)-2,3-dihydroquinazolin-4(1*H*)-one: **3p**

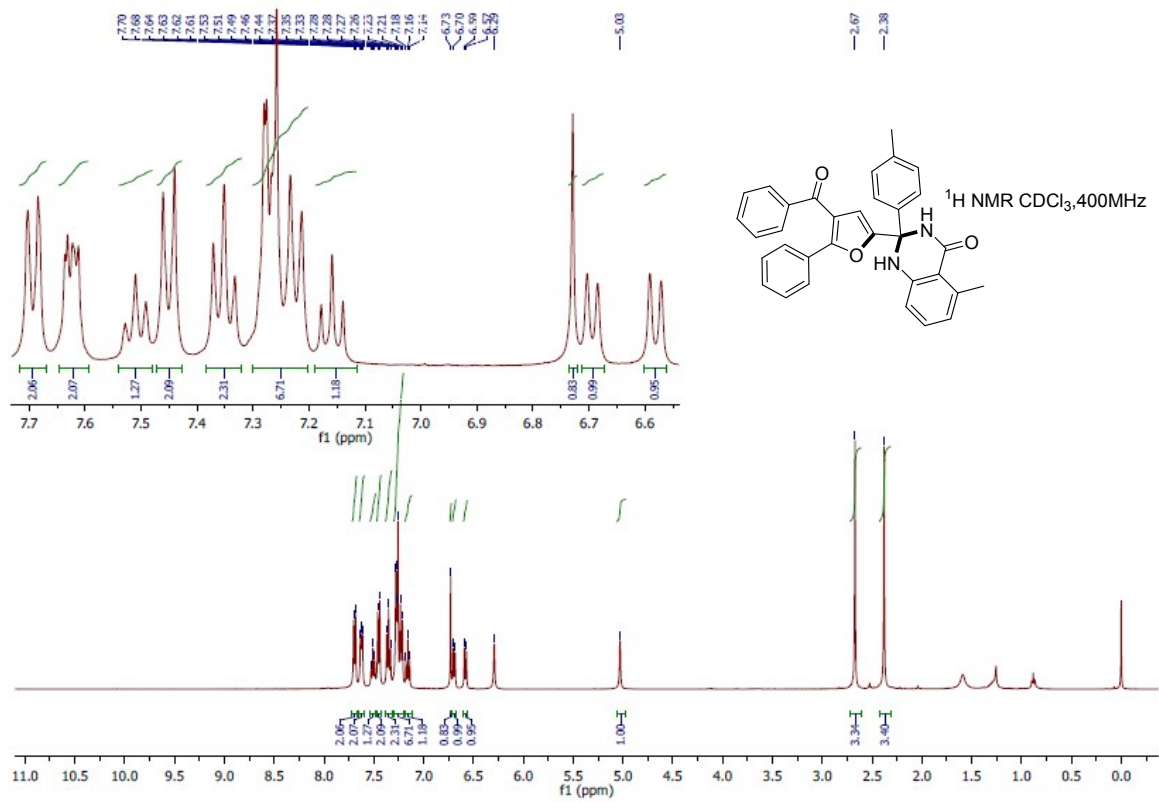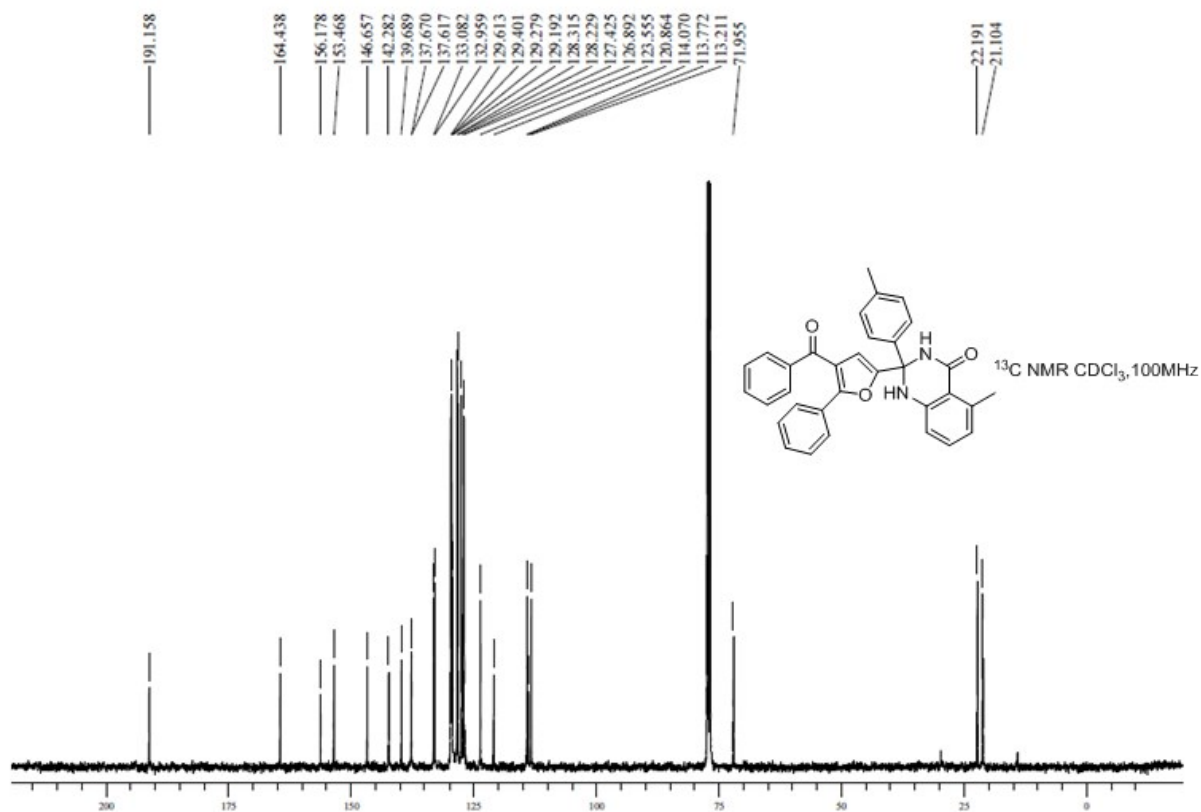

2-(4-Benzoyl-5-phenylfuran-2-yl)-2-(4-methoxyphenyl)-5-methyl-2,3-dihydroquinazolin-4(1H)-one:**3q**

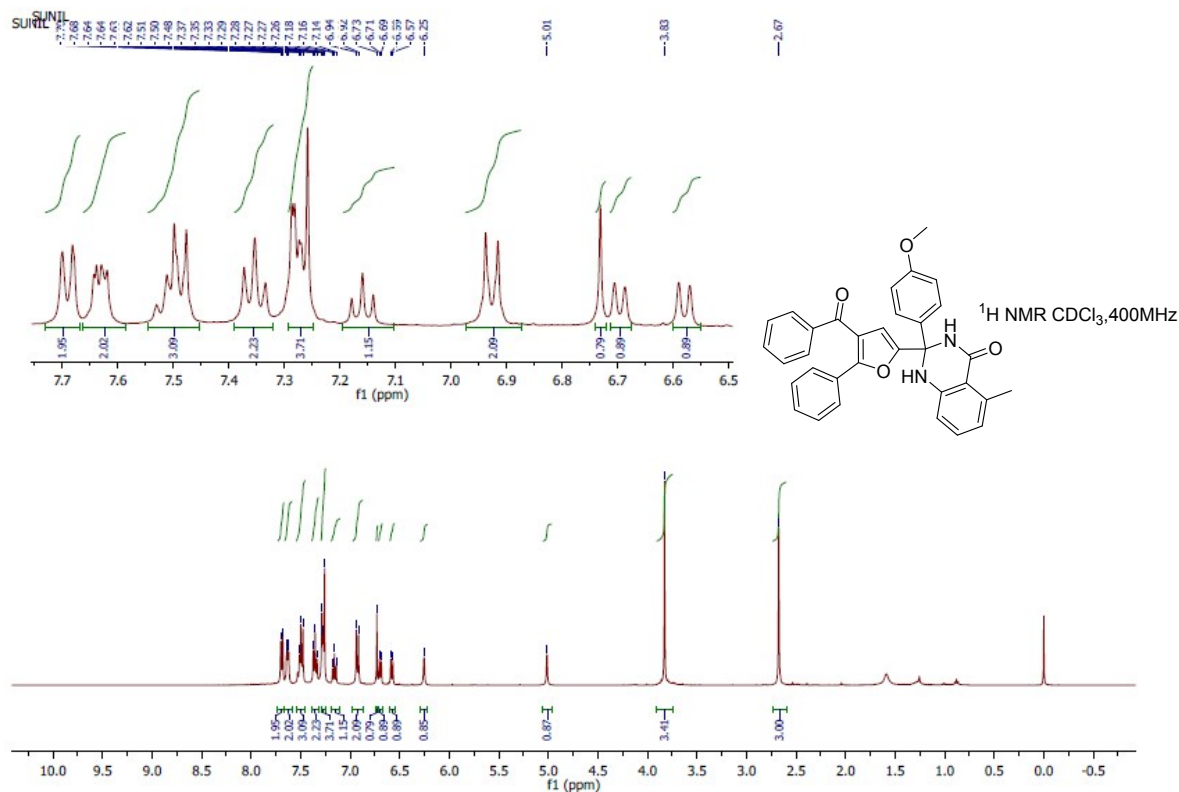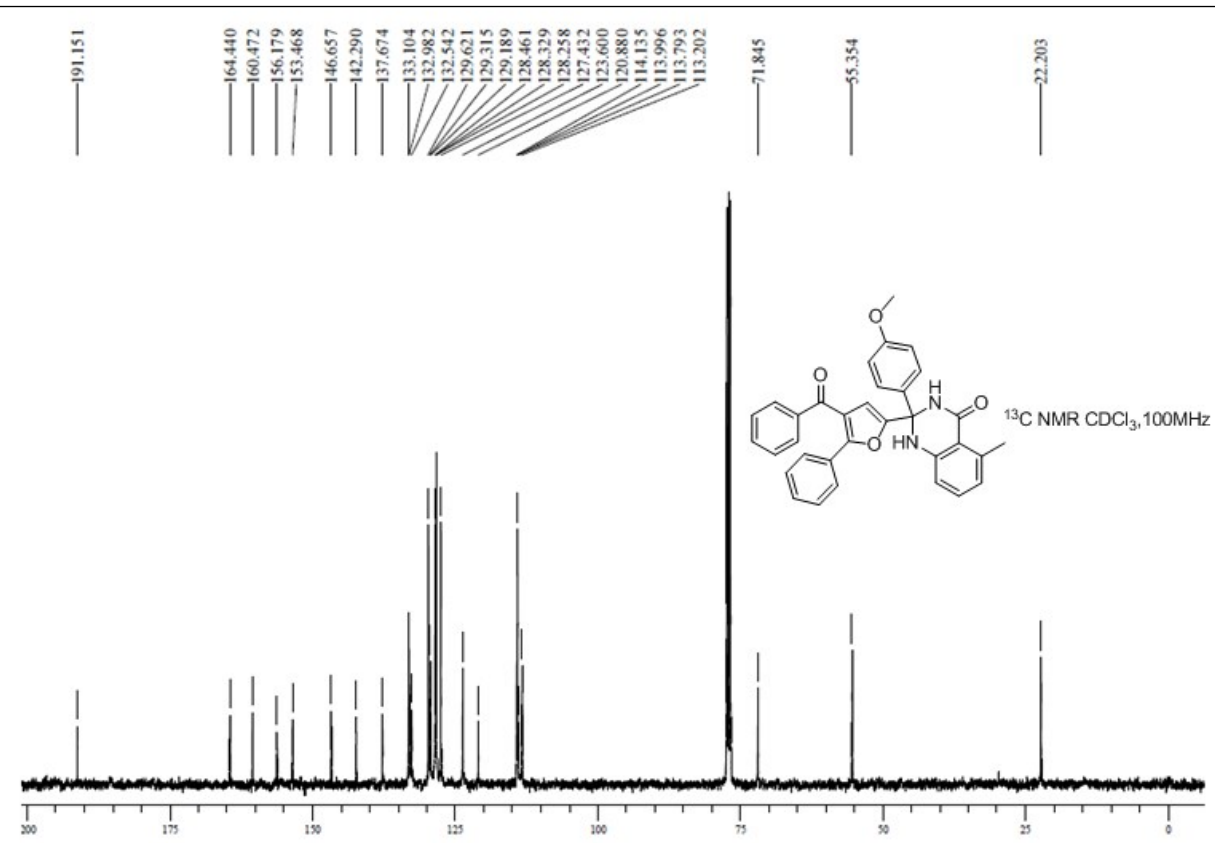

2-(4-Benzoyl-5-phenylfuran-2-yl)-2-(4-fluorophenyl)-5-methyl-2,3-dihydroquinazolin-4(1H)-one: **3r**

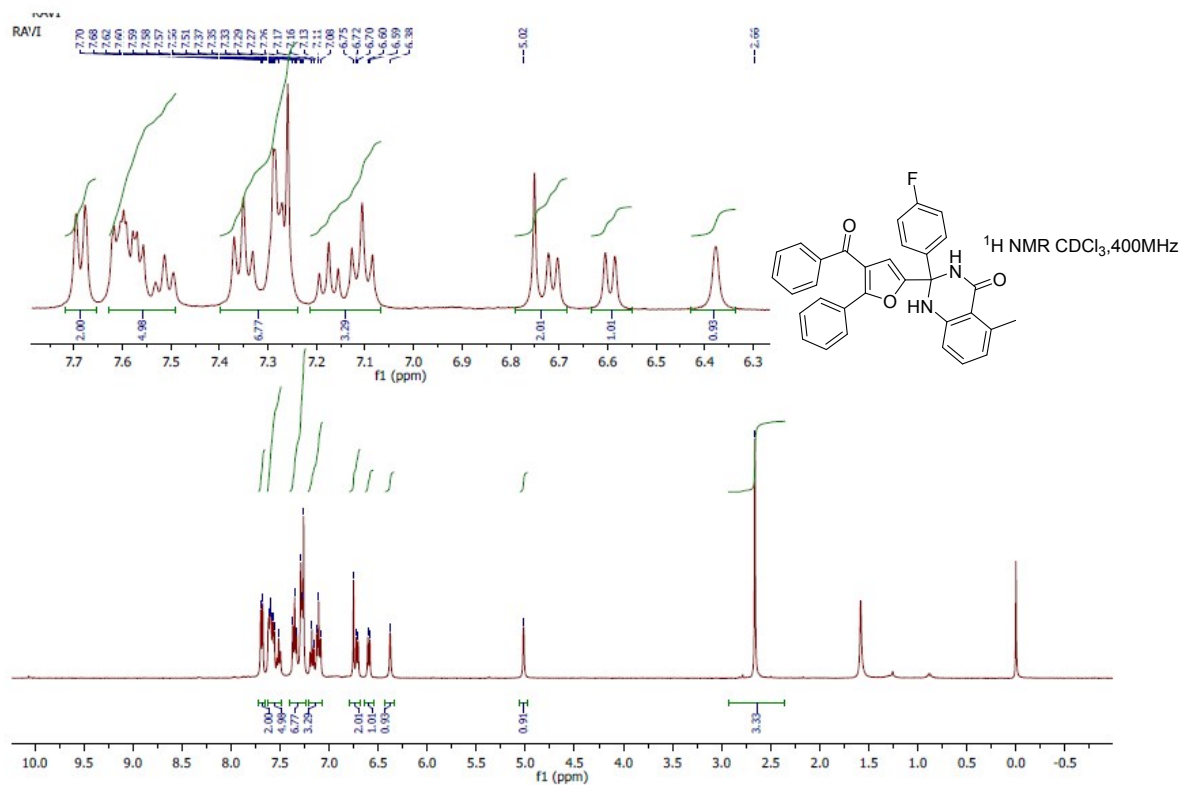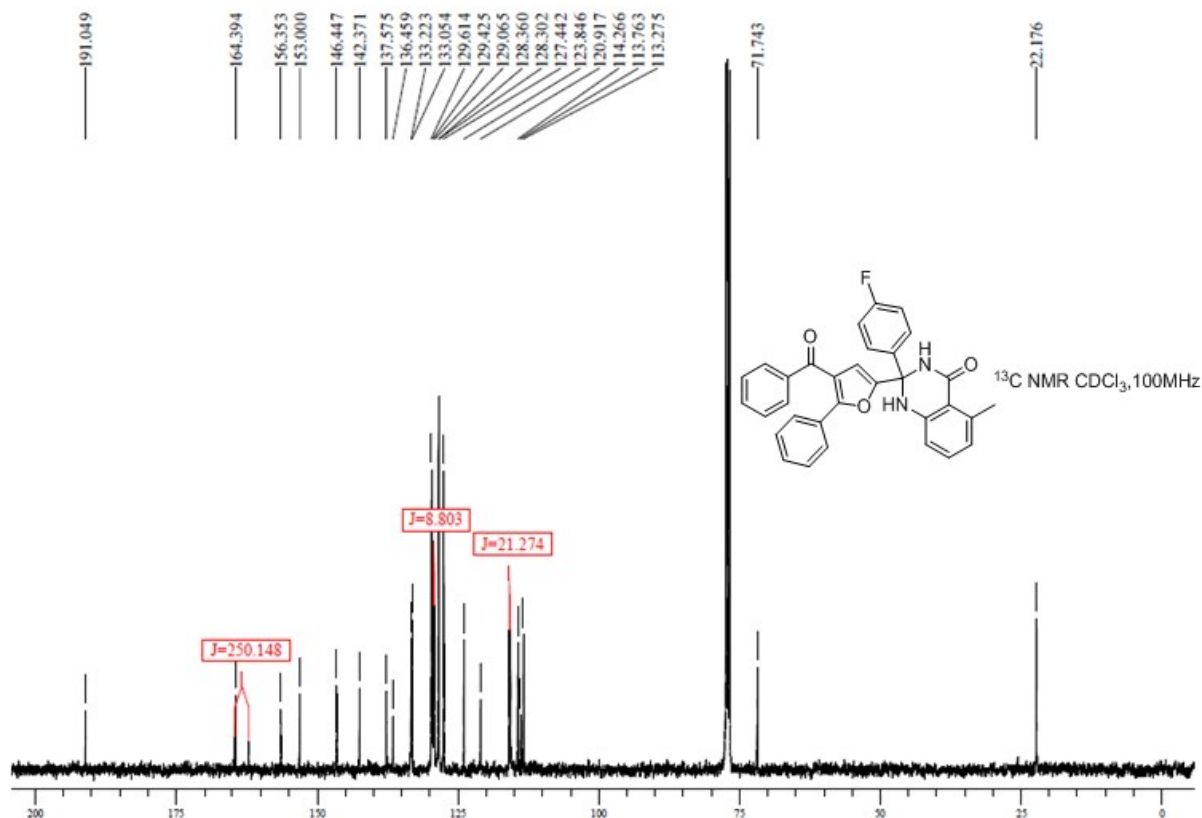

2-(4-Benzoyl-5-phenylfuran-2-yl)-6-chloro-2-(4-fluorophenyl)-2,3-dihydroquinazolin-4(1H)-one: **3s**

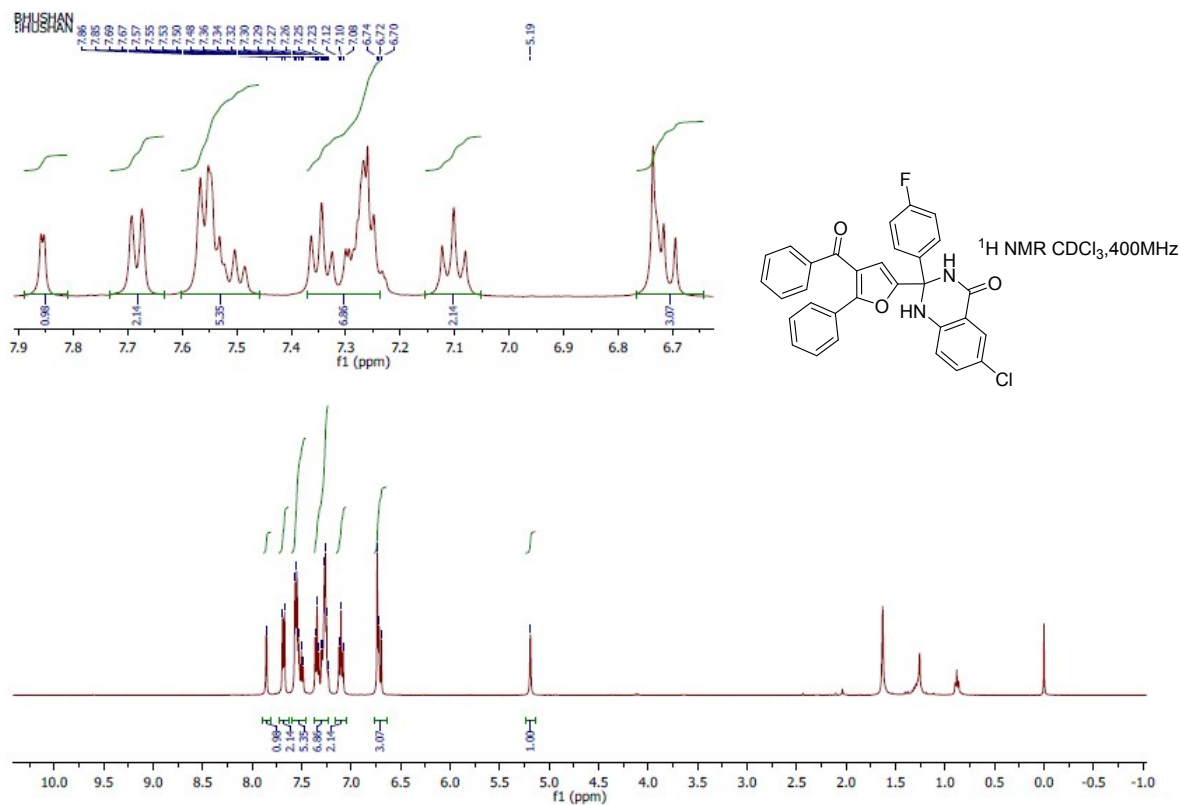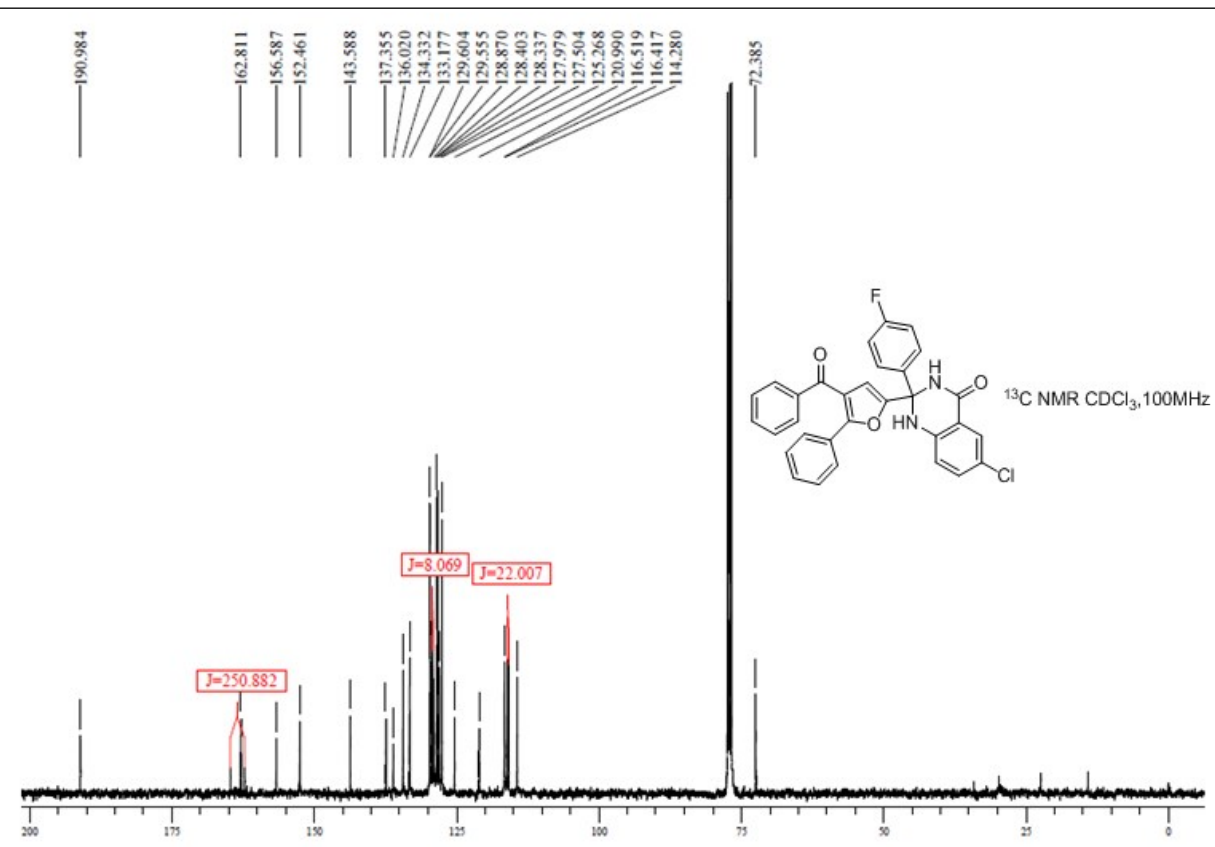

2-(4-Benzoyl-5-phenylfuran-2-yl)-6-bromo-2-(4-fluorophenyl)-2,3-dihydroquinazolin-4(1H)-one: **3t**

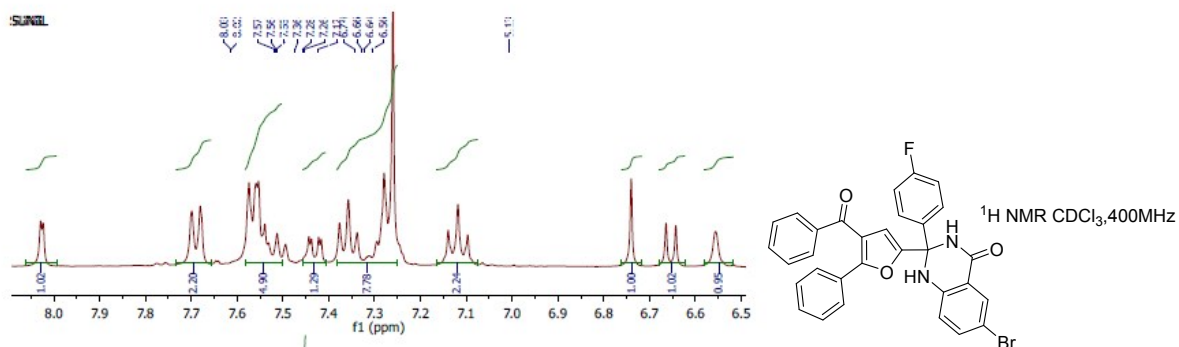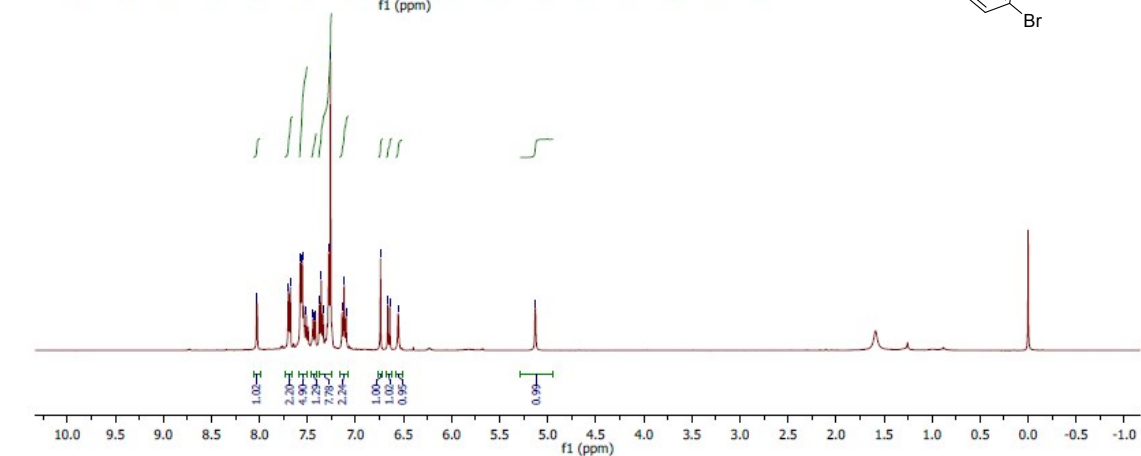

2-(4-Benzoyl-5-phenylfuran-2-yl)-2-(4-fluorophenyl)-6-iodo-2,3-dihydroquinazolin-4(1H)-one: **3u**

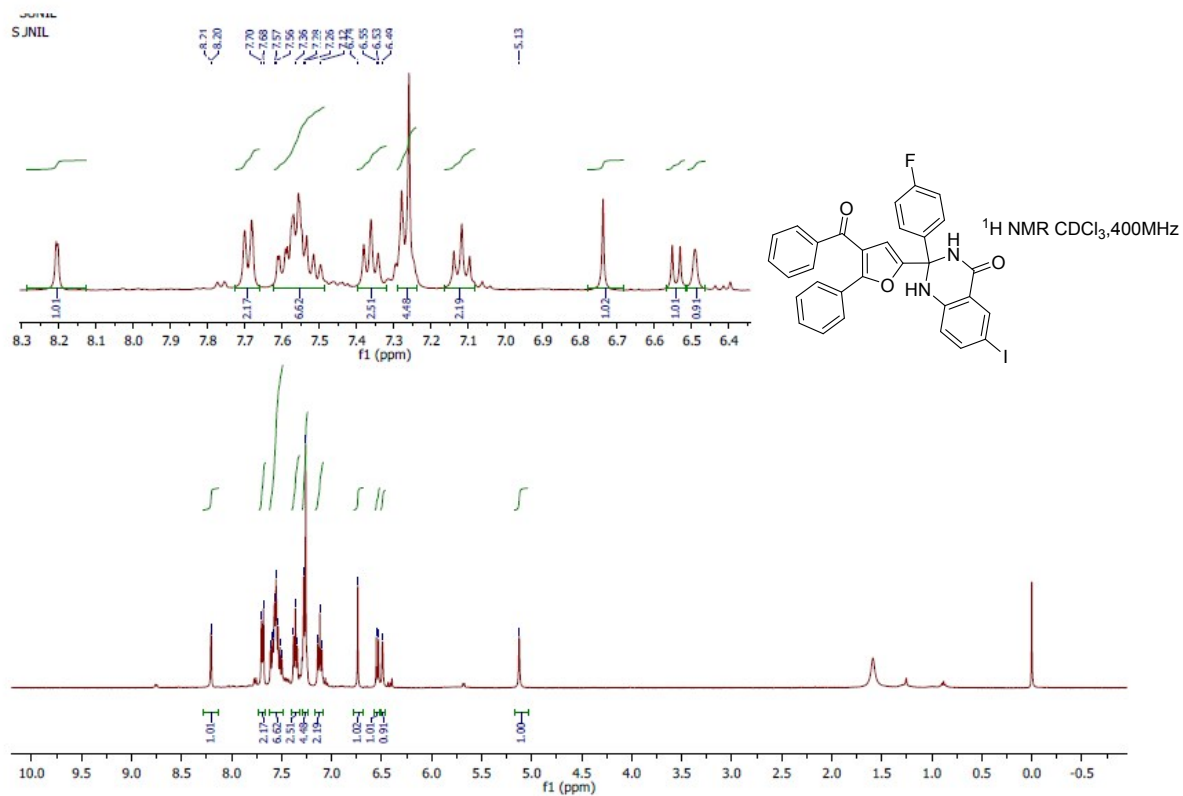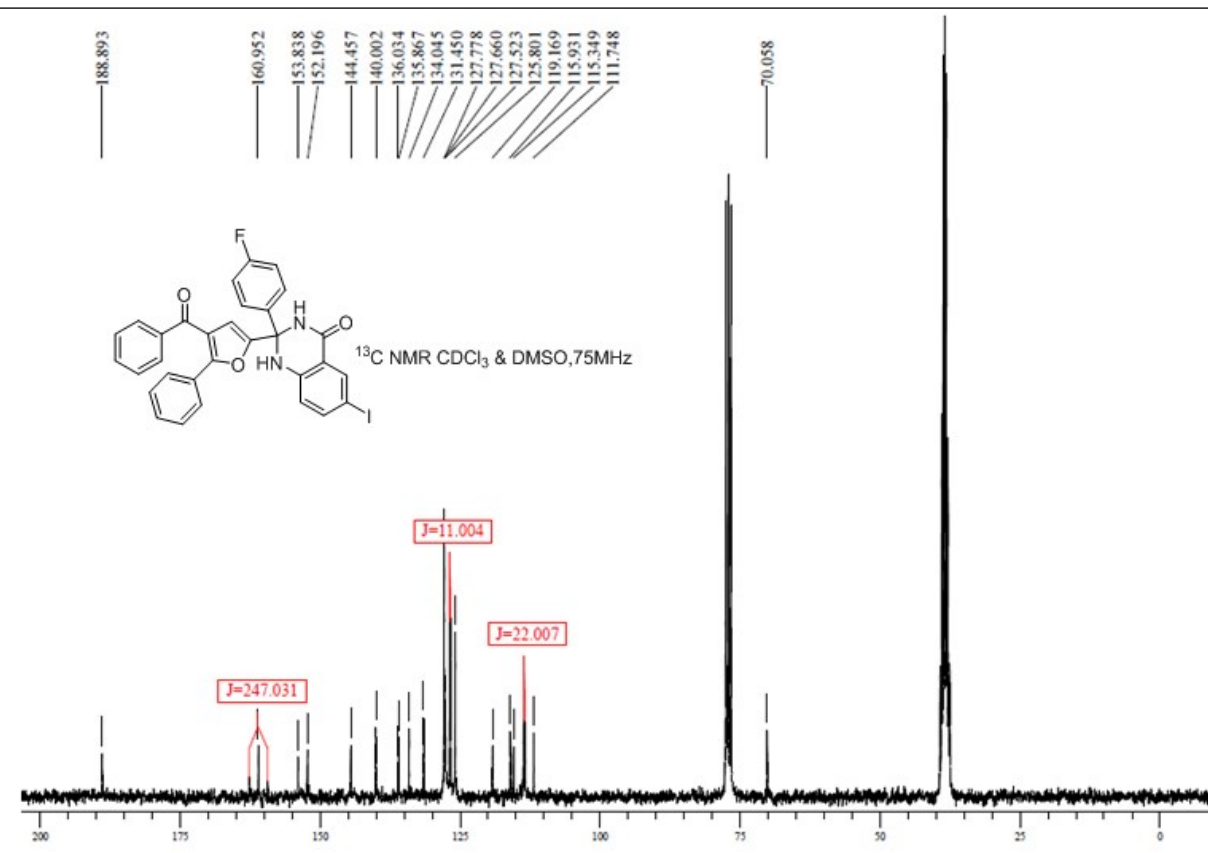



5-Methyl-2-(4-(4-methylbenzoyl)-5-(*p*-tolyl)furan-2-yl)-2-phenyl-2,3-dihydroquinazolin-4(*1H*)-one:  
**3v**

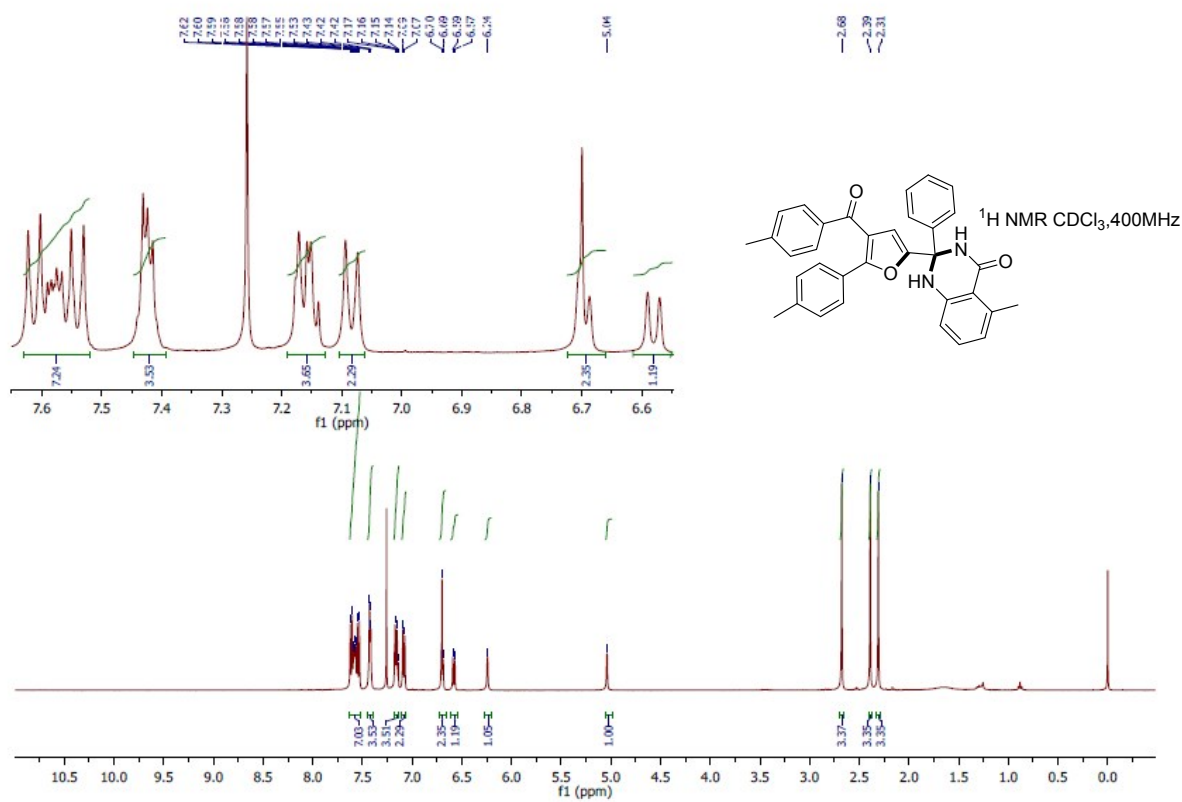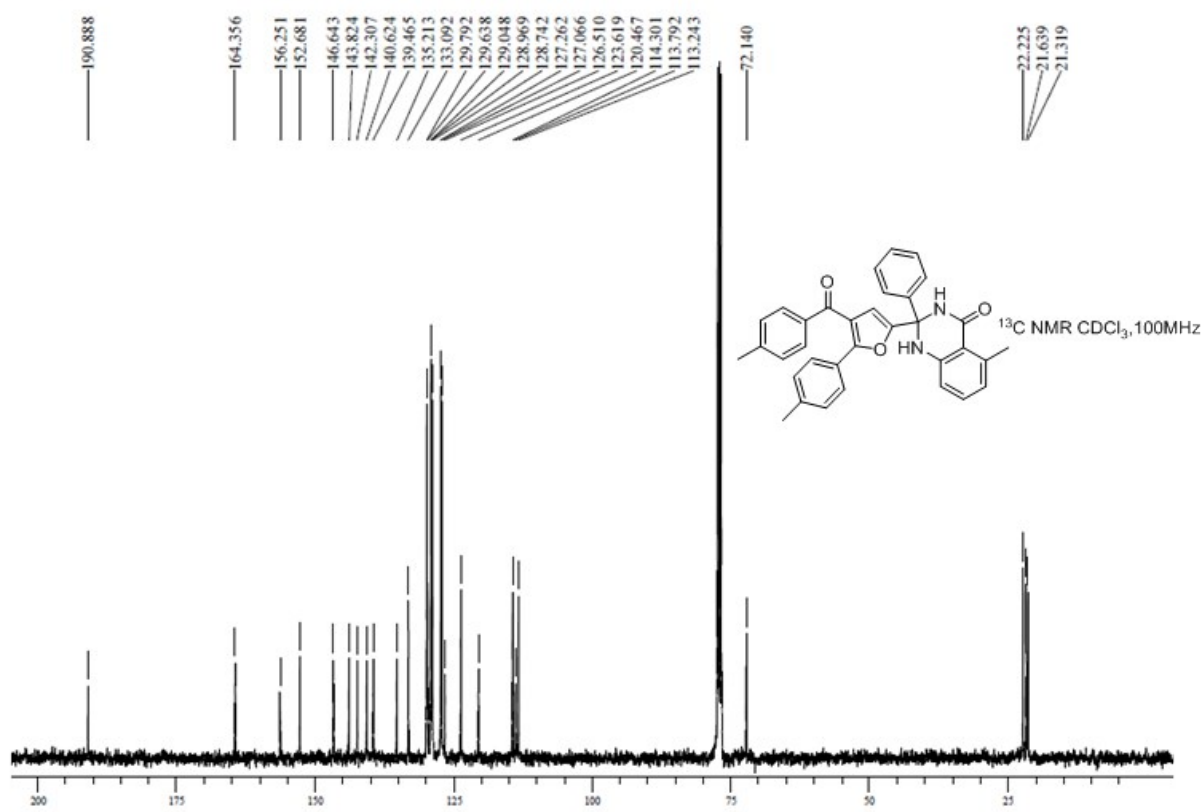

5-Methyl-2-(4-(4-methylbenzoyl)-5-(*p*-tolyl)furan-2-yl)-2-(*p*-tolyl)-2,3-dihydroquinazolin-4(*1H*)-one:**3w**

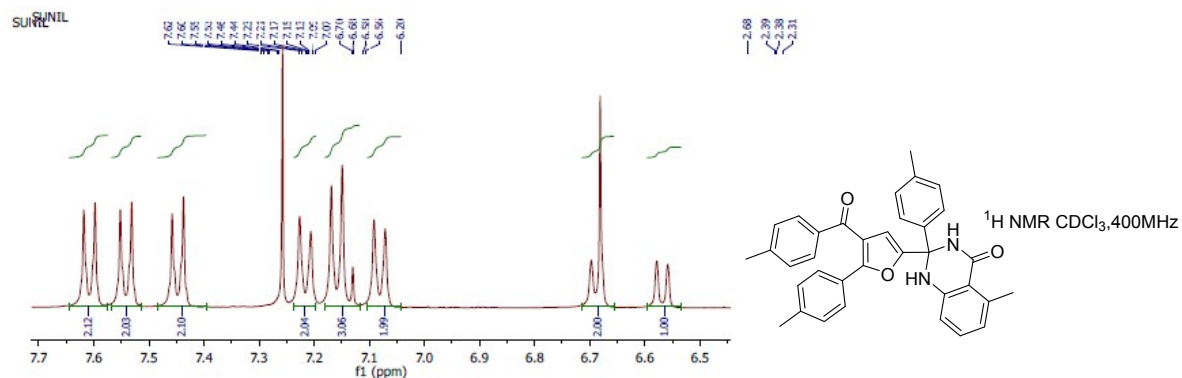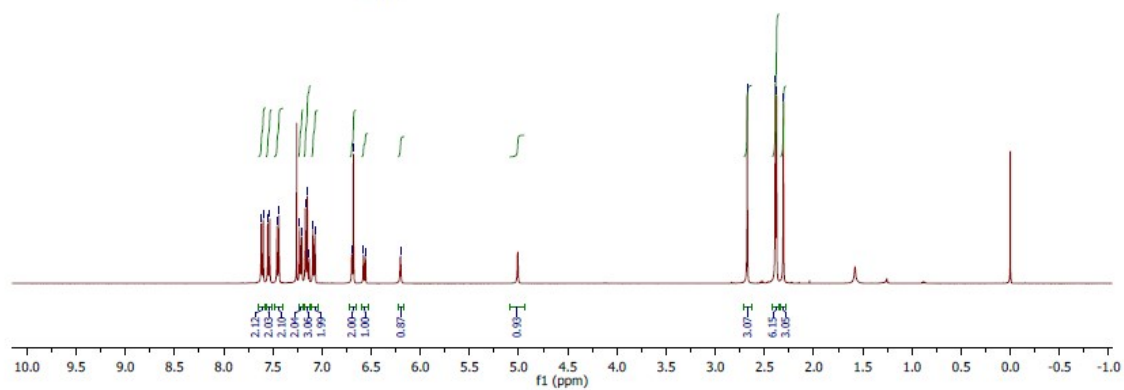



2-(4-Benzoyl-5-phenylfuran-2-yl)-2,7-diphenyl-5-(trifluoromethyl)-2,3-dihydropyrido[2,3-*d*]pyrimidin-4(1*H*)-one:**3x**

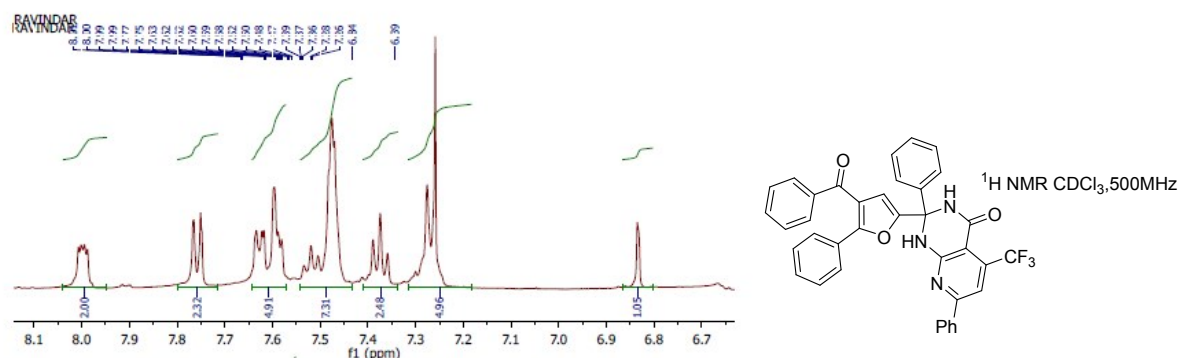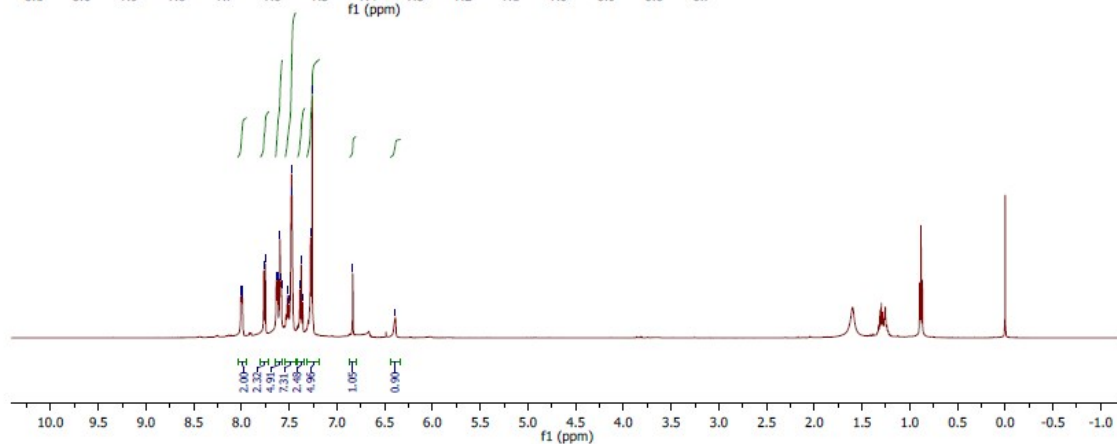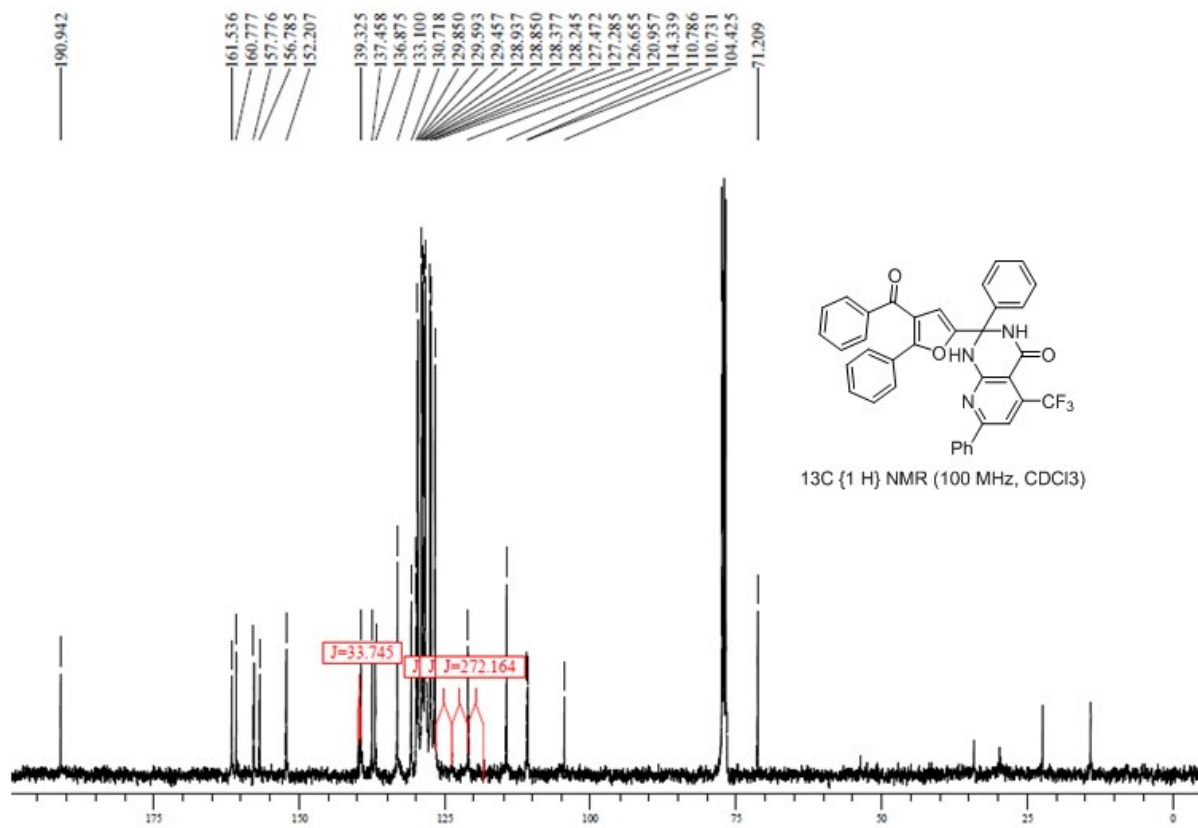

Dimethyl (2-methyl-5-(4-oxo-2-phenyl-1,2,3,4-tetrahydroquinazolin-2-yl)furan-3-yl)phosphonate: **3y**

SUDERSAN M0002  
SUDERSAN M0002

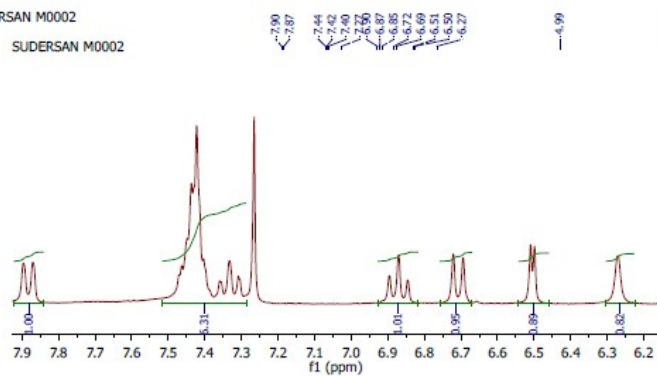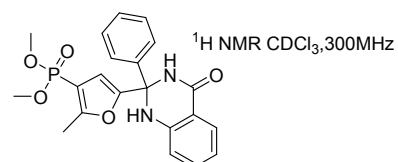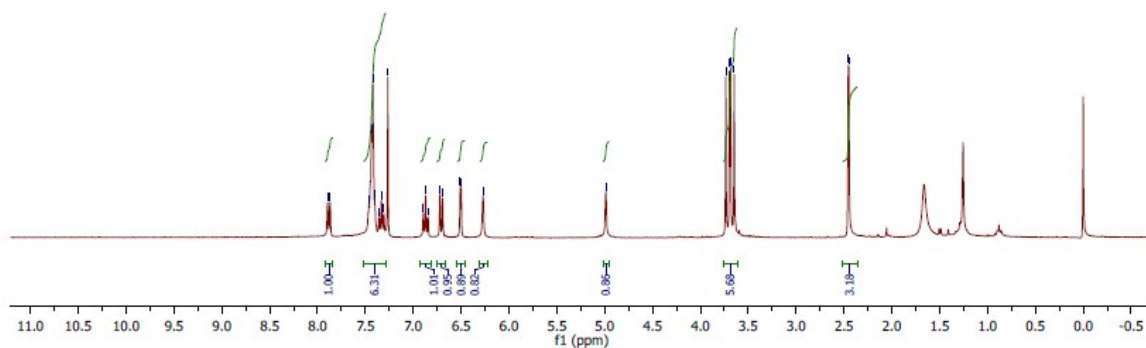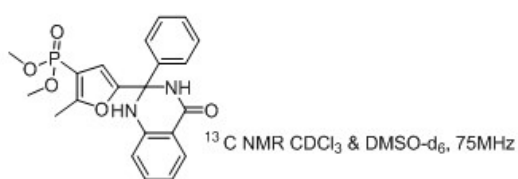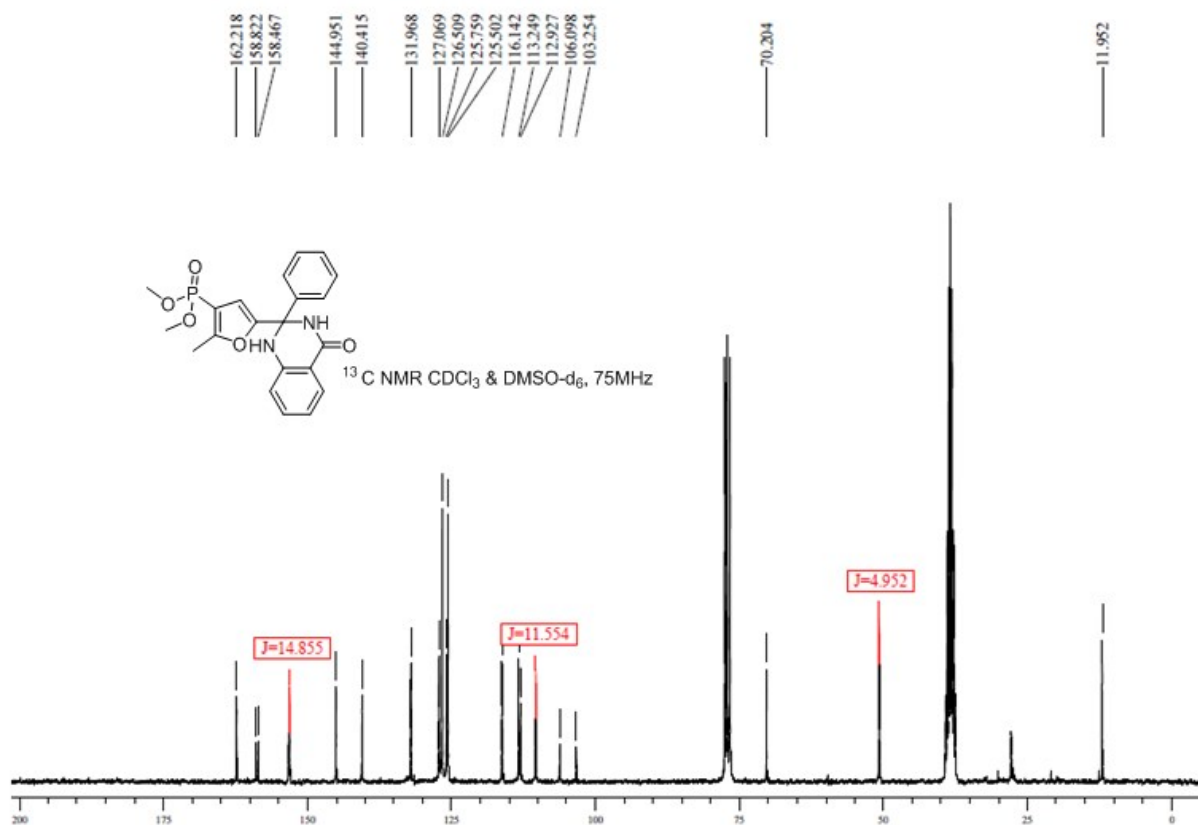

<sup>31</sup>P NMR of compound **3y**

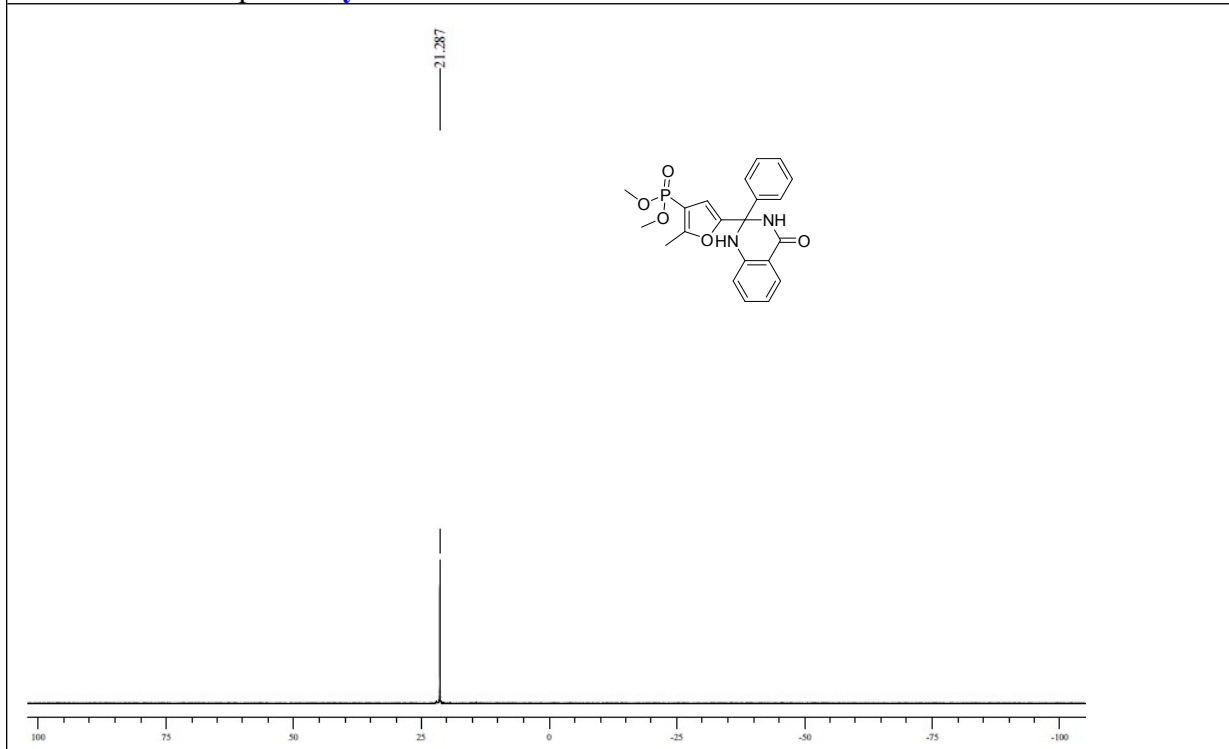

*N'*-((4-Benzoyl-5-phenylfuran-2-yl)(phenyl)methylene)-2-(prop-2-yn-1-yloxy)benzohydrazide: **5**

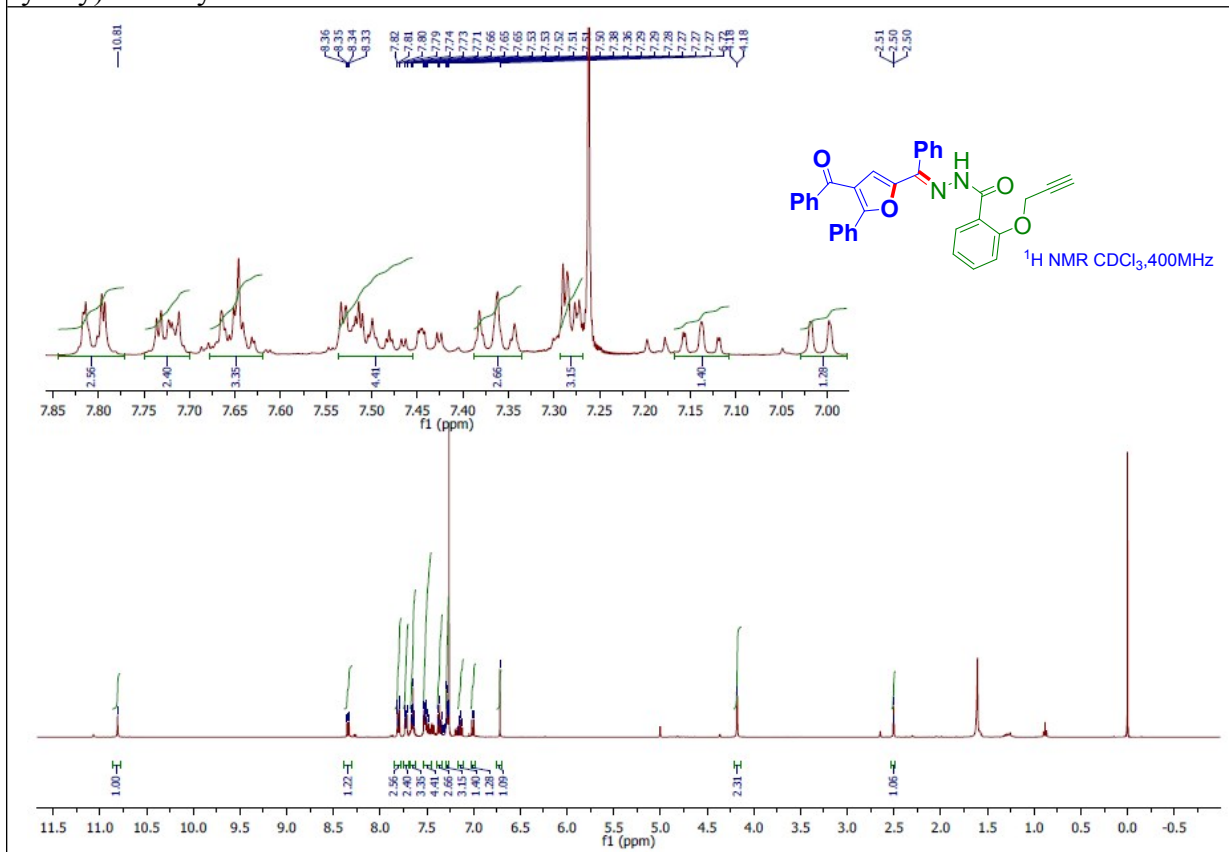

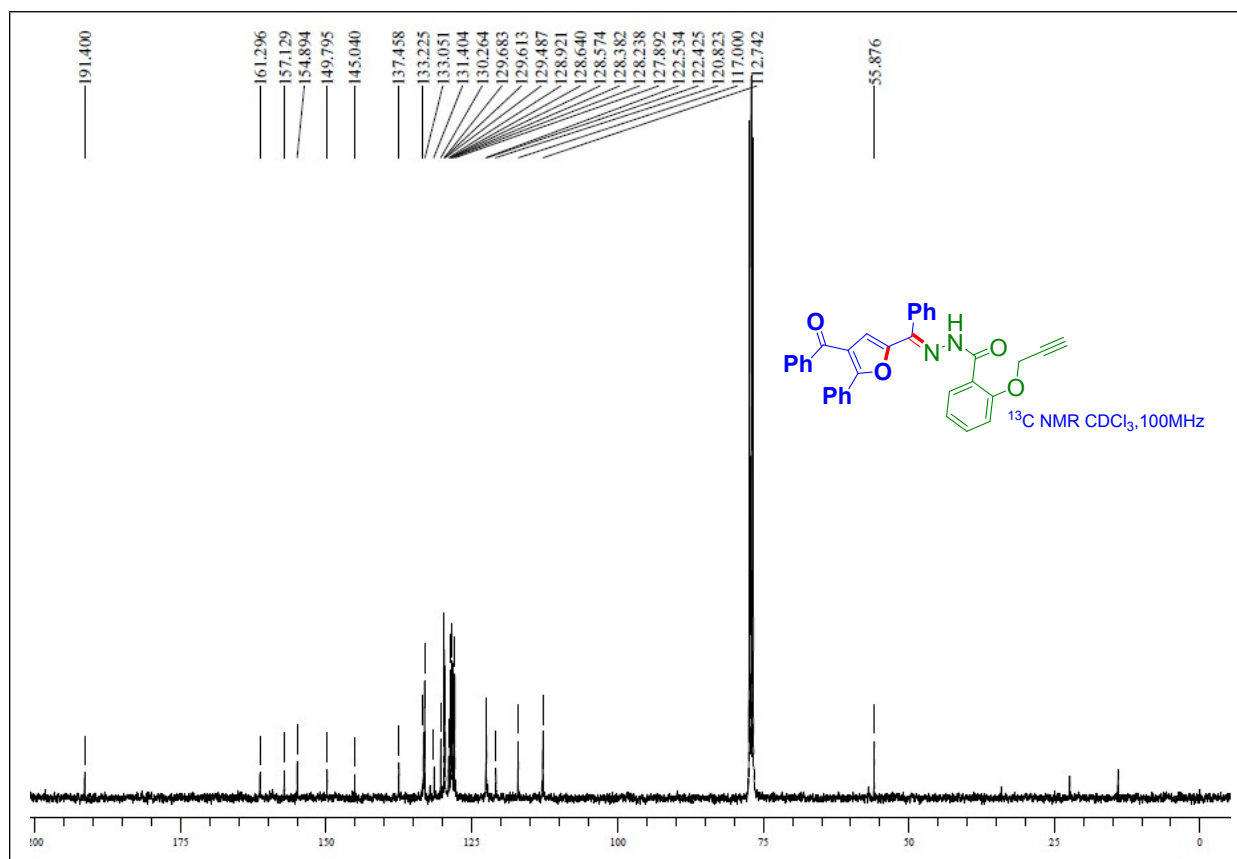

## 2 X-ray crystallography data of (2.1) compound **3a** and (2.2) compound **5**.

### 2.1 Crystal data for compound **3a**

X-ray data for the compound KA302 was collected on a Bruker D8 QUEST instrument with an I $\mu$ S Mo microsource ( $\lambda = 0.7107$  Å) and a PHOTON-100 detector. The raw data frames were reduced and corrected for absorption effects using the Bruker Apex 3 software suite programs.<sup>1</sup> The structure was solved using intrinsic phasing method<sup>2</sup> and further refined with the SHELXL<sup>2</sup> program and expanded using Fourier techniques. Anisotropic displacement parameters were included for all non-hydrogen atoms. The N-bound H atoms were located in difference Fourier maps, and their positions and isotropic displacement parameters were refined. All C bound H atoms were positioned geometrically and treated as riding on their parent C atoms [C-H = 0.93–0.97 Å, and  $U_{\text{iso}}(\text{H}) = 1.5U_{\text{eq}}(\text{C})$  for methyl H or  $1.2U_{\text{eq}}(\text{C})$  for other H atoms].

**Crystal Data for KA302:** C<sub>31</sub>H<sub>22</sub>N<sub>2</sub>O<sub>3</sub> ( $M = 470.50$  g/mol): triclinic, space group P-1 (no. 2),  $a = 8.2197(2)$  Å,  $b = 10.4608(2)$  Å,  $c = 14.4752(3)$  Å,  $\alpha = 77.0948(8)^\circ$ ,  $\beta = 79.6924(8)^\circ$ ,  $\gamma = 81.5655(9)^\circ$ ,  $V = 1186.21(4)$  Å<sup>3</sup>,  $Z = 2$ ,  $T = 294.15$  K,  $\mu(\text{MoK}\alpha) = 0.085$  mm<sup>-1</sup>,  $D_{\text{calc}} = 1.317$  g/cm<sup>3</sup>, 35683 reflections measured ( $4.464^\circ \leq 2\theta \leq 61.018^\circ$ ), 7216 unique ( $R_{\text{int}} = 0.0618$ ,  $R_{\text{sigma}} = 0.0518$ ) which were used in all calculations. The final  $R_1$  was 0.0634 ( $I > 2\sigma(I)$ ) and  $wR_2$  was 0.1669 (all data). CCDC1863534 contains supplementary Crystallographic data for the structure. These data can be obtained free of charge at [www.ccdc.cam.ac.uk/conts/retrieving.html](http://www.ccdc.cam.ac.uk/conts/retrieving.html) [or from the Cambridge Crystallographic Data Centre (CCDC), 12 Union Road, Cambridge CB2 1EZ, UK; fax: +44(0) 1223 336 033; email: [deposit@ccdc.cam.ac.uk](mailto:deposit@ccdc.cam.ac.uk)].

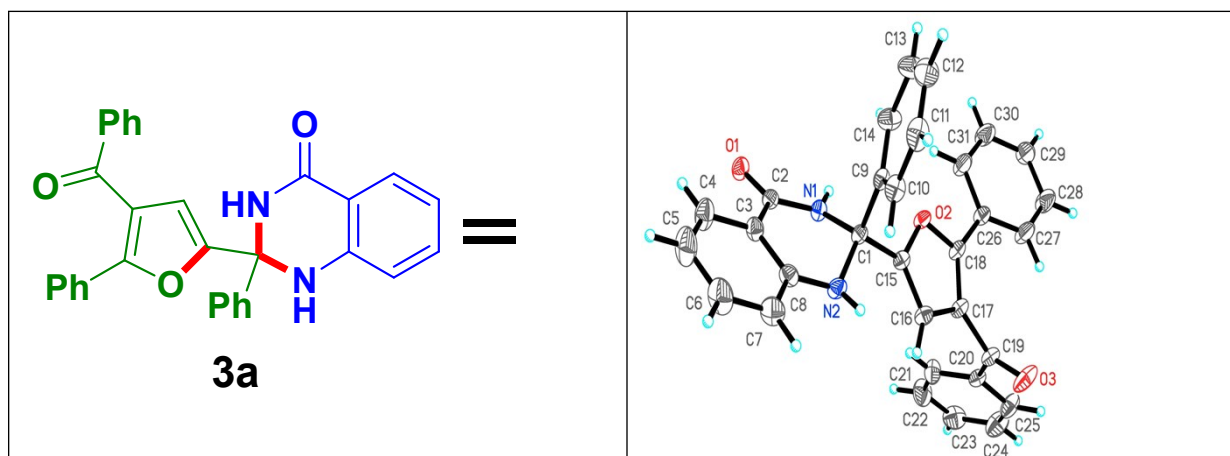

**Fig.1.** A view of **KA302**, showing the atom-labelling scheme. Displacement ellipsoids are drawn at the 30% probability level and H atoms are represented by circles of arbitrary radii. The Compound **3a** was

dissolved in ethanol and heated to 80 °C for 5 minutes and filtered. This solution was kept for 20 days at 28 °C, which leads to formation of single crystals.

## 2.2 Crystal data for compound 5

X-ray data for the compounds were collected at room temperature using a Bruker Smart Apex CCD diffractometer with graphite monochromated MoK $\alpha$  radiation ( $\lambda=0.71073\text{\AA}$ ) with  $\omega$ -scan method.<sup>1</sup> Preliminary lattice parameters and orientation matrices were obtained from four sets of frames. Integration and scaling of intensity data were accomplished using SAINT program.<sup>1</sup> The structure was solved by direct methods using SHELXS<sup>2</sup> and refinement was carried out by full-matrix least-squares technique using SHELXL.<sup>2</sup> Anisotropic displacement parameters were included for all non-hydrogen atoms. The N-bound H atoms and O-bound H atoms were located in difference Fourier maps and their positions and isotropic displacement parameters were refined. All other H atoms were positioned geometrically and treated as riding on their parent C atoms [C-H = 0.93-0.97 Å and  $U_{\text{iso}}(\text{H}) = 1.5U_{\text{eq}}(\text{C})$  for methyl H or  $1.2U_{\text{eq}}(\text{C})$  for other H atoms]. The methyl groups were allowed to rotate but not to tip.

**Crystal Data** for BG03: C<sub>70</sub>H<sub>53</sub>N<sub>4</sub>O<sub>9</sub> ( $M=1066.17$  g/mol): triclinic, space group P-1 (no. 2),  $a = 9.1182(6)$  Å,  $b = 13.8291(10)$  Å,  $c = 23.4126(16)$  Å,  $\alpha = 103.581(1)^\circ$ ,  $\beta = 91.205(2)^\circ$ ,  $\gamma = 98.758(2)^\circ$ ,  $V = 2831.3(3)$  Å<sup>3</sup>,  $Z = 2$ ,  $T = 294.15$  K,  $\mu(\text{Mo K}\alpha) = 0.084$  mm<sup>-1</sup>,  $D_{\text{calc}} = 1.2505$  g/cm<sup>3</sup>, 35814 reflections measured ( $1.8^\circ \leq 2\Theta \leq 50^\circ$ ), 9961 unique ( $R_{\text{int}} = 0.0944$ ,  $R_{\text{sigma}} = 0.1499$ ) which were used in all calculations. The final  $R_1$  was 0.1271 ( $I > 2\sigma(I)$ ) and  $wR_2$  was 0.3437 (all data). CCDC 1898773 contains supplementary Crystallographic data for the structure. These data can be obtained free of charge at [www.ccdc.cam.ac.uk/conts/retrieving.html](http://www.ccdc.cam.ac.uk/conts/retrieving.html) [or from the Cambridge Crystallographic Data Centre (CCDC), 12 Union Road, Cambridge CB2 1EZ, UK; fax: +44(0) 1223 336 033; email: [deposit@ccdc.cam.ac.uk](mailto:deposit@ccdc.cam.ac.uk)].

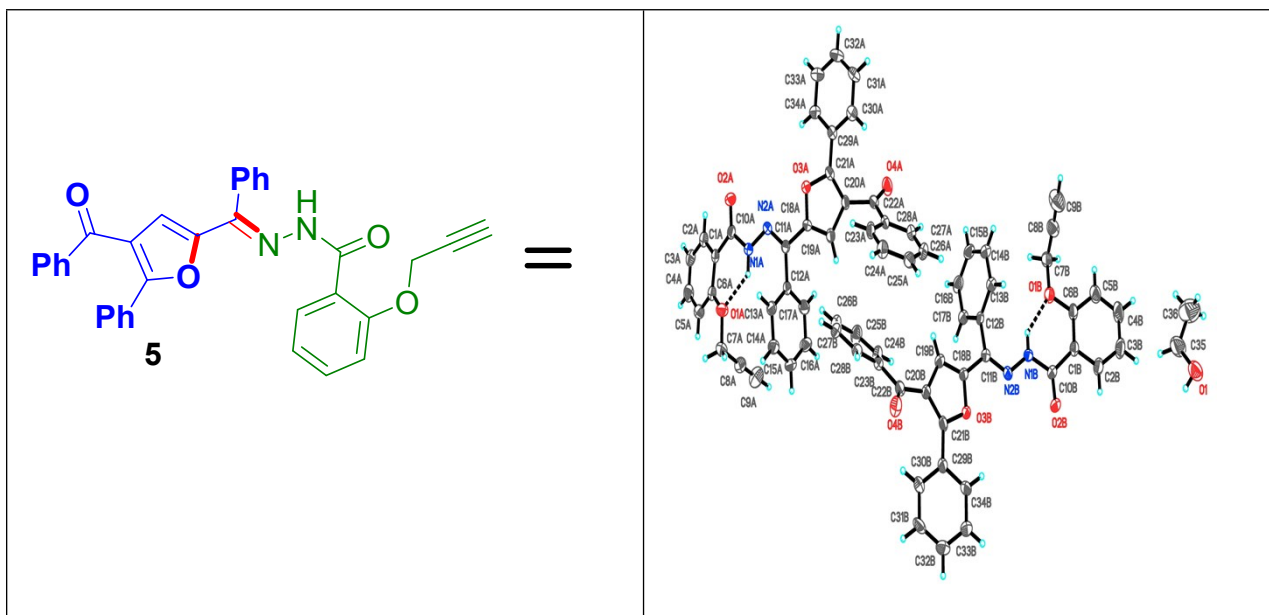

**Fig.2.** A view of BG03, showing the atom-labelling scheme. Displacement ellipsoids are drawn at the 30% probability level and H atoms are represented by circles of arbitrary radii. Hydrogen bonds are shown by dashed lines. The compound **8** was dissolved in ethanol and heated to 80 °C for 5 minutes and filtered. This solution was kept for 15 days at 28 °C, which leads to formation of single crystals.

#### Reference:

1. Bruker (2001). SAINT (Version 6.28a) & SMART (Version 5.625). Bruker AXS Inc., Madison, Wisconsin, USA.
2. Sheldrick G. M. (2015) Acta Crystallogr C71:3-8.
